# Supplementary material
Source: PubMed Central journal article supplement (PMC5730494)
Supplement: NIHMS913225-supplement-OnlineSupplement.pdf [file NIHMS913225-supplement-OnlineSupplement.pdf]

# ONLINE SUPPLEMENT

## Blood pressure control by a secreted FGF Binding Protein, FGFBP1

Elena Tassi<sup>1,\*</sup>, En Yin Lai<sup>2,3,\*</sup>, Lingli Li<sup>2</sup>, Glenn Solis<sup>2</sup>, Yifan Chen<sup>2</sup>, Will Kietzman<sup>1</sup>, Patricio E. Ray<sup>4</sup>, Anna T. Riegel<sup>1</sup>, William J. Welch<sup>2</sup>, Christopher S. Wilcox<sup>2</sup>, and Anton Wellstein<sup>1</sup>

<sup>1</sup>Lombardi Cancer Center, <sup>2</sup>Division of Nephrology and Hypertension, Georgetown University, Washington, DC 20007, USA; <sup>3</sup>Department of Physiology, Zhejiang University, Hangzhou 310058, China; <sup>4</sup>Children's National Medical Center, George Washington University, Washington DC 20001, USA

\*equal contribution

Correspondence: to A.W. email: [anton.wellstein@georgetown.edu](mailto:anton.wellstein@georgetown.edu); Phone +1 (202) 687-3672; Fax +1 (202) 687-4821

**Running Title:** Blood pressure control by FGFBP1

### Contents:

|         |                         |
|---------|-------------------------|
| page    |                         |
| 2 - 4   | Supplemental Methods    |
| 5       | Supplemental References |
| 6 - 36  | Table S1                |
| 37      | Table S2                |
| 38 - 43 | Figures S1 to S6        |

## Supplemental Methods

### Conditional transgenic animal model.

Animal experiments were reviewed and approved by the Institutional Animal Care and Use Committee. Transgenic animals carrying a human BP1 cDNA under the control of a tetracycline response element (TRE-BP1) were mated with CMV-tTA (tet-OFF) mice as described<sup>1</sup>. Transgene expression was suppressed by continuous tetracycline containing diet (=BP1 OFF) and induced by switching the animals to a tetracycline-free, regular diet (=BP1 ON). Doxycycline was used as an orally available tetracycline. FGF2<sup>-/-</sup> mice were obtained from the Jackson laboratory who store embryos generated by the Doetschman laboratory<sup>2</sup>.

### Telemetric monitoring of blood pressure and heart rate.

The surgical procedure and telemetry have been described earlier<sup>3</sup>. Tempol (2 mM) and a high dose of candesartan (10 mg/kg/d<sup>4</sup>; gift from AstraZeneca) were administered through the drinking water. Angiotensin II was administered by minipump.

### In vivo cremaster arteriole contractility.

Anesthetized (1.5 - 2% isoflurane) mice were infused with 1% albumin in 0.9% NaCl to maintain hydration. The cremaster muscle was exteriorized for intravital microscopy. Vascular diameter was measured with a video caliper in real time using computerized data acquisition. Only arterioles that showed >70% vasodilation with 0.1 mM acetylcholine and >70% constriction with 10 μM PE at the beginning and the end of the experiments were selected. Maximum vasodilation was defined as the response to 10 mM acetylcholine. Increasing concentrations of AngII or PE (~20 μl) were superfused over the vessel. At least 3 minutes were allowed between doses and no subsequent doses were applied before recovery to the baseline diameter. PD173,074 (EMD Chemicals, Gibbstown, NJ) was administered by i.p. injection at 1 mg/kg/day.

### Gene expression analysis.

Gene expression analysis was performed on MOE430A Affymetrix arrays with RNA extracted using the Qiagen RNeasy kit that was provided to the Genomics Core Facility for reverse transcription, labelling, and hybridization. Readings from the arrays were analyzed as per the manufacturer's specifications.

Upstream regulators were derived from cDNA array gene expression using the Ingenuity Upstream Regulator Analysis (Qiagen, Germantown, MD) platform<sup>6</sup>. A 1.5-fold difference in gene expression was set as the threshold value. The upstream regulator analysis examines how many known targets are changed and the direction of the change to what is published for a given candidate upstream regulator. IPA's definition of upstream regulator includes any molecule that can affect the expression of a gene. This broad definition includes transcriptional regulators, microRNAs, kinases, phosphatases, chemical compounds, drugs, etc. This is shown in Table S1 below. For each upstream regulator the p-value signifies the overlap of altered genes in the dataset evaluated with genes known to be regulated by the respective upstream regulator. An activation z-score indicates to what extent the pattern changes observed (up or down) match with the direction of gene regulation found in the literature.

Gene Set Enrichment Analysis (GSEA<sup>7</sup>) is a publically available analysis software and data bases from the Broad Institute (<http://software.broadinstitute.org/gsea/index.jsp>) and was also applied to the cDNA array gene expression. Results from hallmark pathways are exemplified in Figure 5B and the complete list is shown in Table S2 below.

### Cell culture, histochemistry and Western blot analysis.

Human HEK293 cells were maintained in DMEM with 10% FCS (Invitrogen, Carlsbad, CA). Human lung microvascular endothelial cells (HMVEC-L) and pulmonary artery smooth muscle cells

(PASM) (Lonza, Basel, Switzerland) were maintained as suggested by the manufacturer. Immunoblot studies for phospho- and total MKK4, ERK1/2, p38, and JNK were performed with the respective rabbit polyclonal antibodies (Cell Signaling, Danvers, MA) as described<sup>8</sup>. Immunoblot analyses for human actin were performed with a respective mouse monoclonal antibody (Chemicon International, Temecula, CA). Immunohistochemistry was as described in<sup>1</sup> with phospho-p38 and phospho-MKK4 antibodies (Cell Signaling, Danvers, MA).

#### **Proteomics analysis of tissue extracts.**

For the mass spectrometry analysis, protein lysates from kidneys were subjected to immunoprecipitation using gamma-bind G-Sepharose beads and an anti-phosphotyrosine monoclonal antibody (4G-10, Millipore). The amount of protein input for immunoprecipitations of the kidney extracts was 3.11 mg/ml (BP1 OFF) and 3.14 mg/ml (BP1 ON) with bovine serum albumin used as the standard. The immunoprecipitated proteins were separated by 2D gel electrophoresis. After electrophoresis, gels were stained with Coomassie blue overnight and washed with ddH<sub>2</sub>O overnight to remove background staining. Stained gels were imaged using a color scanner and spots of distinct intensity cut from the gels for mass spectrometry analyses. Gel slices were subjected to tryptic digest and followed by MS and MS/MS on an ABI MALDI-TOF-TOF. Proteins in the MS or MS/MS analysis were identified based on searches of the Swiss-Prot database using the search engine Mascot as described earlier<sup>9</sup>. The number of matching peptides and the raw protein score were recorded as was the fold difference between BP1 ON and BP1 OFF.

#### **Western blots and immunoprecipitation.**

Detection of the BP1 protein was described earlier<sup>10</sup>. Briefly, organs from BP1 OFF and BP1 ON mice were homogenized in 1 ml of lysis buffer with a MagNa lyser homogenizer (Roche, Indianapolis, IN) and BP1 immunoprecipitated with 2 µg of 3E11 mouse monoclonal antibody<sup>10</sup> for 2 hours at 4°C. Immunoblots were performed with a rabbit polyclonal antibody to human FGF1 (Sigma, St. Louis, MO) and with a mouse monoclonal antibody to mouse actin (Millipore, Temecula, CA). Human recombinant FGF1 (R&D Systems, Minneapolis, MN) (20 ng) was a positive control.

#### **Real-Time Polymerase Chain Reaction.**

Total RNA was isolated from transgenic mouse tissues and from cultured cells using RNA STAT-60 (Tel-Test, Inc., Friendswood, TX). cDNA was synthesized with the iScript cDNA Synthesis Kit (Bio-Rad Laboratories). Quantitative real-time PCR (qRT-PCR) to quantify mRNA expression was performed using iQ SYBR Green Supermix (Bio-Rad Laboratories) as described<sup>1</sup>.

PCR primer sequences:

BP1 sense 5'-ATGAAGATCTGTAGCCTCACC-3'

BP1 antisense 5'-TTCTGAGACCACTTTGCTGT-3'

mouse beta-actin sense 5'-GGCGCTTTTGAAGTCAAGATTTAA-3'

mouse beta-actin antisense 5'-CCTCAGCCACATTTGTAGAAGTTT-3'

mouse AT1R sense 5' - TGCAGGTGACTTTGGCCAC - 3'

mouse AT1R antisense 5' - CCATTGTCCACCCGATGAAG - 3'

**Statistics and data analysis.**

Prism 5 (Graphpad Inc) was used for descriptive statistical analyses that include the assessment of normal distribution of quantitative measurements. The non-linear regression analyses of dose-response data obtained in vivo or in vitro used the functions described earlier<sup>11</sup> and available in Prism 5. A sinus wave function was fit to the circadian measurements. For comparisons between data sets analyzed by non-linear regression analyses, parameters from the best fit were compared using an F-test<sup>11, 12</sup>. The respective p-values and parameters are provided as calculated in Prism 5. ANOVA was used for multiple comparisons and t-tests for paired comparisons. *P* values <0.05 were considered statistically significant. Mean ± SEM values are depicted in the figures. For the GSEA analysis nominal p-values as well as false-discovery rate adjusted q-values are provided in Table S2.

## Supplemental References

1. Tassi E, McDonnell K, Gibby KA, Tilan JU, Kim SE, Kodack DP, Schmidt MO, Sharif GM, Wilcox CS, Welch WJ, Gallicano GI, Johnson MD, Riegel AT, Wellstein A. Impact of fibroblast growth factor-binding protein-1 expression on angiogenesis and wound healing. *Am J Pathol*. 2011;179:2220-2232
2. Zhou M, Sutliff RL, Paul RJ, Lorenz JN, Hoying JB, Haudenschild CC, Yin M, Coffin JD, Kong L, Kranias EG, Luo W, Boivin GP, Duffy JJ, Pawlowski SA, Doetschman T. Fibroblast growth factor 2 control of vascular tone. *Nat Med*. 1998;4:201-207
3. Kawada N, Solis G, Ivey N, Connors S, Dennehy K, Modlinger P, Hamel R, Kawada JT, Imai E, Langenbach R, Welch WJ, Wilcox CS. Cyclooxygenase-1-deficient mice have high sleep-to-wake blood pressure ratios and renal vasoconstriction. *Hypertension*. 2005;45:1131-1138
4. Callera GE, Antunes TT, Correa JW, Moorman D, Gutsol A, He Y, Cat AN, Briones AM, Montezano AC, Burns KD, Touyz RM. Differential renal effects of candesartan at high and ultra-high doses in diabetic mice-potential role of the ACE2/AT2R/Mas axis. *Bioscience reports*. 2016;36
5. Chen Y, Pearlman A, Luo Z, Wilcox CS. Hydrogen peroxide mediates a transient vasorelaxation with tempol during oxidative stress. *Am J Physiol Heart Circ Physiol*. 2007;293:H2085-2092
6. Krämer A, Green J, Pollard J, Tugendreich S. Causal analysis approaches in Ingenuity Pathway Analysis. *Bioinformatics (Oxford, England)*. 2014;30:523-530
7. Subramanian A, Tamayo P, Mootha VK, Mukherjee S, Ebert BL, Gillette MA, Paulovich A, Pomeroy SL, Golub TR, Lander ES, Mesirov JP. Gene set enrichment analysis: a knowledge-based approach for interpreting genome-wide expression profiles. *Proceedings of the National Academy of Sciences of the United States of America*. 2005;102:15545-15550
8. Tassi E, Al-Attar A, Aigner A, Swift MR, McDonnell K, Karavanov A, Wellstein A. Enhancement of fibroblast growth factor (FGF) activity by an FGF-binding protein. *J Biol Chem*. 2001;276:40247-40253
9. Hu Z-Z, Kagan BL, Ariazi EA, Rosenthal DS, Zhang L, Li JV, Huang H, Wu C, Jordan VC, Riegel AT, Wellstein A. Proteomic analysis of pathways involved in estrogen-induced growth and apoptosis of breast cancer cells. *PLoS ONE*. 2011;6:e20410
10. Tassi E, Henke RT, Bowden ET, Swift MR, Kodack DP, Kuo AH, Maitra A, Wellstein A. Expression of a fibroblast growth factor-binding protein during the development of adenocarcinoma of the pancreas and colon. *Cancer Res*. 2006;66:1191-1198
11. Wellstein A, Belz GG, Palm D. Beta adrenoceptor subtype binding activity in plasma and beta blockade by propranolol and beta-1 selective bisoprolol in humans. Evaluation with Schild-plots. *J Pharmacol Expt Ther*. 1988;246:328-337
12. Wellstein A, Pitschner HF. Complex dose-response curves of atropine in man explained by different functions of M1- and M2-cholinoceptors. *Naunyn-Schmiedeberg's Arch Pharmacol*. 1988;338:19-27

**Table S1.** cDNA array gene expression analysis of kidneys. mRNA was extracted from kidneys 48 hour after induction of BP1 and analyzed relative to controls without induction. Ingenuity Pathway Analysis was used to identify Upstream Regulators <sup>6</sup>. *P*-values are shown. As available, activation z-scores are included. Negative z-scores indicate inhibitory Upstream Regulators. For genes that function as "Upstream Regulators", the 48 h gene expression relative to control (log-fold) is included [examples: 0.301 = 2-fold up; - 0.301 = 2-fold down; 0 = no change relative to control ] The data is sorted by *P* values.

| <b>Upstream Regulator</b> | <b>Log ratio mRNA 48h / control</b> | <b>Activation z-score</b> | <b>p-value of overlap</b> |
|---------------------------|-------------------------------------|---------------------------|---------------------------|
| beta-estradiol            |                                     | 0.897                     | 3.64E-29                  |
| methylprednisolone        |                                     | 1.988                     | 3.51E-28                  |
| lipopolysaccharide        |                                     | 1.575                     | 1.18E-25                  |
| TP53                      | -0.263                              | 2.098                     | 3.24E-25                  |
| HNF4A                     | -0.655                              | -0.578                    | 1.22E-23                  |
| HTT                       | 0.289                               | 0.379                     | 1.64E-23                  |
| dexamethasone             |                                     | -0.934                    | 1.83E-22                  |
| tretinoin                 |                                     | -0.522                    | 1.09E-20                  |
| TGFB1                     | 0                                   | 1.386                     | 1.41E-20                  |
| nitrofurantoin            |                                     | 3.874                     | 3.43E-20                  |
| TO-901317                 |                                     | 0.532                     | 9.86E-20                  |
| HNF1A                     | -0.15                               | -2.349                    | 9.13E-19                  |
| TNF                       | -0.324                              | 0.497                     | 9.13E-19                  |
| pirinixic acid            |                                     | 2.159                     | 5.18E-18                  |
| IL1B                      | -0.102                              | 2.741                     | 7.92E-18                  |
| ciprofibrate              |                                     | 5.346                     | 8.3E-18                   |
| ACOX1                     | -0.349                              | -5.898                    | 9.34E-18                  |
| progesterone              |                                     | 0.468                     | 1.66E-17                  |
| forskolin                 |                                     | 0.785                     | 3.36E-16                  |
| FOS                       | 0.617                               | -0.84                     | 8.5E-16                   |
| CTNNB1                    | -0.639                              | -1.769                    | 1.17E-15                  |
| D-glucose                 |                                     | 0.009                     | 1.73E-15                  |
| IL6                       | -0.11                               | 1.222                     | 2.35E-15                  |
| U0126                     |                                     | -1.413                    | 2.44E-15                  |
| PPARA                     | 0.686                               | 2.557                     | 2.48E-15                  |
| SP1                       | 0.588                               | -1.628                    | 2.69E-15                  |
| NR3C1                     | -0.978                              | 1.002                     | 9.16E-15                  |
| methapyrilene             |                                     | 2.837                     | 2.83E-14                  |
| ethanol                   |                                     | 1.519                     | 3.03E-14                  |
| acetaminophen             |                                     | 3.372                     | 3.93E-14                  |
| RORA                      | 0.615                               | 0.501                     | 5.1E-14                   |
| dihydrotestosterone       |                                     | 0.599                     | 1.53E-13                  |
| carbon tetrachloride      |                                     | 0.636                     | 2.12E-13                  |

|                               |        |        |          |
|-------------------------------|--------|--------|----------|
| methotrexate                  |        | -0.45  | 2.2E-13  |
| Insulin                       |        | 1.498  | 4.02E-13 |
| ERBB2                         | 0.207  | 0.838  | 4.55E-13 |
| MYC                           | 0.084  | 1.131  | 7.59E-13 |
| L-triiodothyronine            |        | -0.982 | 7.63E-13 |
| NR1I2                         | -0.376 | 1.974  | 7.96E-13 |
| APP                           |        | 0.683  | 9.12E-13 |
| FOXA2                         | -0.328 | -0.26  | 1.14E-12 |
| RXRA                          | -0.559 | -0.317 | 1.2E-12  |
| PRKAG3                        |        |        | 1.28E-12 |
| CREB1                         | -0.265 | 1.837  | 1.38E-12 |
| CEBPB                         | 1.036  | -0.208 | 1.6E-12  |
| EGF                           | 0.254  | 1.773  | 1.65E-12 |
| Sos                           |        |        | 1.93E-12 |
| LEP                           | -0.024 | -0.725 | 4.24E-12 |
| mifepristone                  |        | -0.547 | 8.97E-12 |
| NFE2L2                        | 0.218  | 1.87   | 9.34E-12 |
| NFKBIA                        | 0.792  | 0.656  | 9.68E-12 |
| HRAS                          | 0.109  | 0.957  | 1.15E-11 |
| PDGF BB                       |        | 2.286  | 1.75E-11 |
| YY1                           | 0.48   | -0.697 | 2.43E-11 |
| CLOCK                         | 0.35   | 1.71   | 3.62E-11 |
| phorbol myristate acetate     |        | 0.217  | 5.47E-11 |
| cycloheximide                 |        | 0.656  | 5.54E-11 |
| CEBPA                         | 0.092  | -1.047 | 6.57E-11 |
| RORC                          | -0.41  |        | 7.94E-11 |
| LY294002                      |        | -1.273 | 9.03E-11 |
| FSH                           |        | 1.132  | 1.37E-10 |
| cisplatin                     |        | 2.054  | 1.96E-10 |
| TCOF1                         | 0.218  |        | 2.6E-10  |
| Ins1                          | -0.197 | -0.433 | 3.71E-10 |
| trichostatin A                |        | 0.59   | 4.92E-10 |
| 8-bromo-cAMP                  |        | -0.696 | 5.35E-10 |
| PRL                           | -0.265 | 0.047  | 6.09E-10 |
| 1,2-dithiol-3-thione          |        | 1.696  | 6.76E-10 |
| PD98059                       |        | -1.472 | 9.4E-10  |
| IGF1                          | -0.951 | 0.429  | 1.23E-09 |
| E. coli B5 lipopolysaccharide |        | 0.43   | 1.26E-09 |
| PDX1                          | -0.696 | 1.883  | 1.62E-09 |
| AR                            | 0.228  | -0.255 | 1.8E-09  |
| rosiglitazone                 |        | -0.057 | 1.81E-09 |
| thyroid hormone               |        | -0.48  | 2.12E-09 |
| POR                           | 0.036  | -0.366 | 2.6E-09  |

|                                              |        |        |             |
|----------------------------------------------|--------|--------|-------------|
| 1,4-bis[2-(3,5-dichloropyridyloxy)]benzene   |        | -1.205 | 3.38E-09    |
| tunicamycin                                  |        | 1.371  | 3.82E-09    |
| PTEN                                         | 0.72   | 0.228  | 3.93E-09    |
| NR1I3                                        | -0.355 | -1.366 | 4.51E-09    |
| lactacystin                                  |        | 0.777  | 5.23E-09    |
| GH1                                          |        | 0.904  | 6.18E-09    |
| streptozocin                                 |        | 0.994  | 7.01E-09    |
| fenofibrate                                  |        | 2.086  | 7.85E-09    |
| propylthiouracil                             |        | -0.652 | 7.93E-09    |
| IL3                                          |        | 1.479  | 8.22E-09    |
| valproic acid                                |        | 1.165  | 1.11E-08    |
| diethylstilbestrol                           |        | 0.106  | 1.35E-08    |
| benzyloxycarbonyl-Leu-Leu-Leu aldehyde       |        | 0.977  | 1.46E-08    |
| Cg                                           |        | 1.54   | 0.000000015 |
| triamcinolone acetonide                      |        | 1.193  | 1.52E-08    |
| cholic acid                                  |        | 0.972  | 1.61E-08    |
| cadmium chloride                             |        | 2.368  | 1.73E-08    |
| NR1H4                                        | 0      | 0.084  | 1.75E-08    |
| LIPE                                         | -0.081 | 0.653  | 1.78E-08    |
| PGR                                          | -0.002 | 2.185  | 1.83E-08    |
| 17-alpha-ethinylestradiol                    |        | 0.57   | 1.83E-08    |
| prostaglandin E2                             |        | 2.309  | 2.72E-08    |
| SREBF1                                       | -0.288 | 0.407  | 2.75E-08    |
| methylselenic acid                           |        | -1.539 | 4.18E-08    |
| JUN                                          | 0.884  | -0.141 | 4.86E-08    |
| camptothecin                                 |        | 0.609  | 5.25E-08    |
| thapsigargin                                 |        | 3.06   | 5.75E-08    |
| mercuric chloride                            |        | 2.072  | 6.04E-08    |
| miR-30c-5p (and other miRNAs w/seed GUAAACA) |        | -1.026 | 6.52E-08    |
| hydrogen peroxide                            |        | 1.875  | 7.67E-08    |
| butyric acid                                 |        | 1.063  | 9.17E-08    |
| TAF4                                         | -0.398 | 0.124  | 0.000000106 |
| gentamicin                                   |        | 5.633  | 0.000000118 |
| miR-1-3p (and other miRNAs w/seed GGAAUGU)   |        | -1.197 | 0.00000014  |
| chenodeoxycholic acid                        |        | -0.042 | 0.000000146 |
| EGFR                                         | -0.648 | 0.576  | 0.000000159 |
| AGT                                          | -0.019 | 0.637  | 0.000000169 |
| INSR                                         | -0.492 | 1.693  | 0.000000181 |
| cholesterol                                  |        | -0.149 | 0.000000183 |
| IGF2                                         | 1.549  | 0.496  | 0.000000191 |



|                                                |        |        |             |
|------------------------------------------------|--------|--------|-------------|
| IRS1                                           | 0.591  | 1.218  | 0.000000193 |
| OSM                                            |        | 0.546  | 0.000000198 |
| testosterone                                   |        | 0.625  | 0.000000227 |
| trovafloxacin                                  |        | 1.225  | 0.000000245 |
| ZBTB20                                         | 1.253  | -3.441 | 0.000000255 |
| CD38                                           | -0.317 | 3.8    | 0.000000256 |
| AKT1                                           | 0.189  | 0.363  | 0.000000268 |
| Ca2+                                           |        | 1.786  | 0.000000285 |
| curcumin                                       |        | -1.47  | 0.00000029  |
| CFTR                                           | 0.049  | 1.033  | 0.0000003   |
| ATN1                                           | 0.377  |        | 0.000000313 |
| CREM                                           | 0.584  | 2.212  | 0.000000348 |
| dinoprost                                      |        | 0.239  | 0.000000363 |
| Creb                                           |        | 1.14   | 0.000000369 |
| RNA polymerase II                              |        |        | 0.000000379 |
| 6-hydroxydopamine                              |        | 1.552  | 0.000000383 |
| NR1H3                                          | 0.149  | -0.738 | 0.000000383 |
| FECH                                           | -0.337 |        | 0.000000389 |
| miR-16-5p (and other miRNAs<br>w/seed AGCAGCA) |        | -2.045 | 0.000000457 |
| SP3                                            | 0.347  | 1.859  | 0.000000473 |
| NR5A2                                          | -0.478 | 1.25   | 0.000000485 |
| PPARG                                          | -0.008 | 0.933  | 0.000000493 |
| cyclic AMP                                     |        | -0.238 | 0.000000676 |
| cyclosporin A                                  |        | 0.358  | 0.000000761 |
| PSEN1                                          | -0.372 | 1.211  | 0.00000081  |
| FXR ligand-FXR-Retinoic acid-<br>RXR $\alpha$  |        | -1.118 | 0.000000817 |
| 4-hydroxytamoxifen                             |        | 0.584  | 0.000000824 |
| RHO                                            | -0.486 | -1.091 | 0.000000841 |
| GW 4064                                        |        | -0.237 | 0.000000932 |
| halofuginone                                   |        | -0.13  | 0.00000102  |
| cadmium                                        |        | 1.472  | 0.00000103  |
| sirolimus                                      |        | -3.999 | 0.00000105  |
| tetrachlorodibenzodioxin                       |        | 2.325  | 0.00000106  |
| MECP2                                          | 0.461  | -0.617 | 0.00000112  |
| MYOD1                                          | -0.206 | -1.238 | 0.00000115  |
| LEPR                                           | -0.981 | 0.41   | 0.00000121  |
| 4-phenylbutyric acid                           |        | -1.974 | 0.00000129  |
| androgen                                       |        | -1.353 | 0.00000135  |
| troglitazone                                   |        | 1.137  | 0.00000138  |
| MED1                                           | -0.193 | 0.294  | 0.00000145  |
| anisomycin                                     |        | 0.085  | 0.00000153  |

|                                               |        |        |            |
|-----------------------------------------------|--------|--------|------------|
| EPO                                           |        | 2.455  | 0.00000156 |
| KRAS                                          | 0.677  | 0.07   | 0.00000171 |
| CD3                                           |        | -0.157 | 0.00000173 |
| GW501516                                      |        | 1.255  | 0.00000181 |
| bromobenzene                                  |        | 0.842  | 0.00000183 |
| dimethyl sulfoxide                            |        | -0.153 | 0.00000184 |
| potassium chloride                            |        | 1.013  | 0.00000189 |
| thioacetamide                                 |        | -0.757 | 0.00000192 |
| ESR1                                          | -0.707 | 0.08   | 0.00000201 |
| Lh                                            |        | 0.115  | 0.00000204 |
| selenomethylselenocysteine                    |        | -2.331 | 0.00000209 |
| ERBB4                                         | -0.153 | 0.501  | 0.00000238 |
| fulvestrant                                   |        | 1.364  | 0.00000244 |
| FGF2                                          | -0.05  | 2.65   | 0.00000248 |
| TAF4B                                         |        | 0.896  | 0.00000252 |
| HIF1A                                         | 0.678  | 0.448  | 0.00000273 |
| ONECUT1                                       | -0.337 | -1.974 | 0.00000288 |
| tamoxifen                                     |        | -0.178 | 0.00000344 |
| NFkB (complex)                                |        | 0.139  | 0.0000037  |
| dexamethasone phosphate                       |        | 2.891  | 0.00000374 |
| ATF4                                          | 0.939  | 1.375  | 0.00000393 |
| RARG                                          | -0.502 | -1.109 | 0.0000043  |
| IFNG                                          | -0.194 | 1.175  | 0.00000478 |
| miR-155-5p (miRNAs w/seed<br>UAAUGCU)         |        | 0.236  | 0.00000493 |
| alitretinoin                                  |        | -0.61  | 0.00000493 |
| HGF                                           | -0.306 | 1.838  | 0.00000508 |
| bortezomib                                    |        | 1.966  | 0.0000052  |
| fatty acid                                    |        | 0.414  | 0.00000533 |
| PXR ligand-PXR-Retinoic acid-<br>RXR $\alpha$ |        | 0.032  | 0.00000548 |
| T3-TR-RXR                                     |        | -1.525 | 0.00000548 |
| bexarotene                                    |        | -0.134 | 0.00000566 |
| SIM1                                          | 0.2    | 0.386  | 0.00000591 |
| ARNT2                                         | -0.419 | 0.885  | 0.00000602 |
| AGN194204                                     |        | 2.578  | 0.00000609 |
| raloxifene                                    |        | -0.938 | 0.00000617 |
| Gh                                            | -0.474 | -0.595 | 0.0000062  |
| STAT3                                         | 0.782  | -0.657 | 0.00000635 |
| oleic acid                                    |        | 0.684  | 0.00000639 |
| FGF1                                          | -0.311 | 0.192  | 0.00000659 |
| FGF19                                         | -0.15  | 0.812  | 0.00000667 |
| bisphenol A                                   |        | 0.592  | 0.00000686 |

|                                                 |        |        |            |
|-------------------------------------------------|--------|--------|------------|
| Pkc(s)                                          |        | 2.064  | 0.00000711 |
| IL1                                             |        | -0.282 | 0.00000742 |
| CAV1                                            | 0.089  | 1.082  | 0.00000799 |
| PPARD                                           | -0.132 | 0.954  | 0.00000829 |
| prednisolone                                    |        | 0.725  | 0.00000857 |
| arsenite                                        |        | 2.099  | 0.00000867 |
| corticosterone                                  |        | 1.696  | 0.00000867 |
| doxorubicin                                     |        | 1.093  | 0.00000895 |
| NFYC                                            | -0.004 | -1     | 0.00000912 |
| bucladesine                                     |        | -0.027 | 0.00000918 |
| 5-N-ethylcarboxamido adenosine                  |        | -0.13  | 0.0000107  |
| MGEA5                                           | 0.348  | -0.577 | 0.0000111  |
| USF2                                            | 0.116  | -2.575 | 0.0000112  |
| SLC13A1                                         | -0.07  | 0      | 0.0000116  |
| Mapk                                            |        | 1.699  | 0.0000131  |
| GPD1                                            | -0.455 |        | 0.0000143  |
| paclitaxel                                      |        | -0.355 | 0.0000147  |
| diethylnitrosamine                              |        | 2.857  | 0.0000147  |
| WISP2                                           | -0.169 | 0.64   | 0.0000151  |
| bezafibrate                                     |        | 1.895  | 0.0000155  |
| IL4                                             | -0.068 | 1.337  | 0.0000155  |
| miR-221-3p (and other miRNAs<br>w/seed GCUACAU) |        | -1.291 | 0.0000165  |
| NKX3-1                                          | -0.262 |        | 0.0000177  |
| RARA                                            | -0.013 | -0.917 | 0.0000194  |
| RAF1                                            | -0.3   | 2.769  | 0.0000202  |
| palmitic acid                                   |        | 1.693  | 0.0000211  |
| clofibrate                                      |        | 3.347  | 0.0000215  |
| SLC25A13                                        | 0.043  |        | 0.0000215  |
| HNF1B                                           | -0.833 | -0.488 | 0.0000219  |
| MYCN                                            | -0.474 | 1.307  | 0.0000222  |
| IL5                                             | -0.34  | 4.52   | 0.0000231  |
| FOXA1                                           | -0.169 | -0.113 | 0.0000277  |
| phenobarbital                                   |        | -2.671 | 0.0000277  |
| CD40LG                                          | -0.54  | 0.137  | 0.0000292  |
| miR-21-5p (and other miRNAs<br>w/seed AGCUUUAU) |        | -0.63  | 0.0000301  |
| Vegf                                            |        | 2.357  | 0.0000308  |
| IL13                                            | -0.208 | -0.016 | 0.0000323  |
| FAS                                             | -0.007 | -1.054 | 0.0000353  |
| THRB                                            | -0.695 | 1.045  | 0.0000356  |
| LRP6                                            | 0.222  | 0      | 0.0000356  |
| CDKN2A                                          | -0.106 | 1.84   | 0.0000357  |

|                                                 |        |        |           |
|-------------------------------------------------|--------|--------|-----------|
| cocaine                                         |        | 2.729  | 0.0000364 |
| estrogen receptor                               |        | 0.323  | 0.0000405 |
| norepinephrine                                  |        | 1.566  | 0.0000424 |
| EGR1                                            | 1.025  | -0.053 | 0.0000424 |
| Rxr                                             |        | 0.198  | 0.0000424 |
| NCOR-LXR-Oxysterol-RXR-9 cis                    |        |        |           |
| RA                                              |        | -0.389 | 0.0000437 |
| pregnenolone carbonitrile                       |        | -0.12  | 0.0000451 |
| RET                                             | -0.245 | 0.885  | 0.0000463 |
| FOXO1                                           | 0.513  | 0.881  | 0.0000476 |
| monorden                                        |        | 2.121  | 0.0000481 |
| SMARCB1                                         | 0.211  | -0.177 | 0.0000484 |
| IGF1R                                           | 0.336  | 2.68   | 0.0000538 |
| linoleic acid                                   |        | 0.436  | 0.0000562 |
| metribolone                                     |        | 0.183  | 0.0000568 |
| NR3C2                                           |        | 1.031  | 0.0000576 |
| Histone h3                                      |        | 0      | 0.0000612 |
| BDNF                                            | -0.504 | -0.926 | 0.0000631 |
| okadaic acid                                    |        | 1.389  | 0.0000638 |
| MAP2K1                                          | -0.082 | 2.116  | 0.0000648 |
| GAST                                            | -0.129 | 2.544  | 0.0000659 |
| HOXA10                                          | 0.052  | -0.728 | 0.0000675 |
| glucocorticoid                                  |        | 0.953  | 0.0000686 |
| leucine                                         |        | -1.207 | 0.0000697 |
| amino acids                                     |        | -2.18  | 0.0000697 |
| amphetamine                                     |        | 1.576  | 0.0000701 |
| INS                                             | -0.329 | 1.66   | 0.0000751 |
| MET                                             | -1.115 | -0.496 | 0.0000824 |
| ETS1                                            | -0.499 | 0.57   | 0.0000871 |
| TERT                                            | -0.521 | 0.447  | 0.0000873 |
| SYVN1                                           | 0.164  | 1.616  | 0.0000888 |
| TGFBR2                                          | -0.624 | -0.151 | 0.0000899 |
| actinomycin D                                   |        | -1.625 | 0.0000909 |
| N-ethyl-N-nitrosourea                           |        |        | 0.0000926 |
| SIN3A                                           | -0.181 | 0.447  | 0.0000929 |
| AHR                                             | -0.093 | 0.213  | 0.000095  |
| ADRA1A                                          | -0.182 |        | 0.0000954 |
| PI3K (complex)                                  |        | 1.467  | 0.0000983 |
| GNA12                                           | -0.415 | 1.478  | 0.000102  |
| kainic acid                                     |        | 2.138  | 0.000103  |
| MTPN                                            | 1.119  | 0.258  | 0.000105  |
| miR-124-3p (and other miRNAs<br>w/seed AAGGCAC) |        | -1.323 | 0.000106  |

|                                                  |        |        |          |
|--------------------------------------------------|--------|--------|----------|
| CP-55940                                         |        | 0.655  | 0.000107 |
| K+                                               |        | -0.907 | 0.000107 |
| WNT3A                                            | -0.654 | -0.895 | 0.000109 |
| Tcf 1/3/4                                        |        | -1.4   | 0.000109 |
| ADRB                                             |        | 0.192  | 0.000109 |
| ELOVL5                                           | 0.106  | -1.869 | 0.000109 |
| dehydroisoandrosterone                           |        | -1.158 | 0.00011  |
| miR-141-3p (and other miRNAs<br>w/seed AACACUG)  |        | -0.061 | 0.000111 |
| HSF1                                             | -0.108 | 1.546  | 0.000114 |
| genistein                                        |        | -1.887 | 0.000117 |
| ZAP70                                            | -0.699 | 0.158  | 0.000122 |
| mannose                                          |        | -0.378 | 0.000124 |
| CYP1A1                                           | 0.051  | 2.309  | 0.000128 |
| RB1                                              | 0.401  | 1.151  | 0.000128 |
| TEAD4                                            | -0.534 |        | 0.000129 |
| bleomycin                                        |        | -1.149 | 0.000134 |
| deferroxamine                                    |        | 0.568  | 0.000136 |
| NR4A1                                            | 0.638  | -1.161 | 0.000137 |
| WT1                                              | 0.076  | 0.667  | 0.000138 |
| EGR2                                             | 0.174  | 0.278  | 0.000139 |
| estrogen                                         |        | -0.953 | 0.000142 |
| ERK                                              |        | 1.056  | 0.000145 |
| RARB                                             | -0.371 | -0.351 | 0.000147 |
| flutamide                                        |        | -0.851 | 0.000147 |
| GNB2                                             | 0.203  |        | 0.000148 |
| NFYB                                             | 0.354  |        | 0.000152 |
| USF1                                             | -0.141 | -1.433 | 0.000156 |
| Histone h4                                       |        |        | 0.000156 |
| MTOR                                             | -0.796 | 2.724  | 0.000156 |
| NPC1                                             | 0.234  | 1.349  | 0.000158 |
| wortmannin                                       |        | -0.893 | 0.000159 |
| isoproterenol                                    |        | 0.26   | 0.000161 |
| ADRA1D                                           |        |        | 0.000162 |
| miR-133a-3p (and other miRNAs<br>w/seed UUGGUCC) |        | 0.107  | 0.00017  |
| arotinoid acid                                   |        | -0.166 | 0.00017  |
| EDN1                                             | -0.097 | 1.087  | 0.000173 |
| acenocoumarol                                    |        | 2      | 0.000175 |
| USE1                                             | 0.381  | -1.154 | 0.000175 |
| ATF6B                                            | 0.155  |        | 0.000175 |
| CYP4F2                                           | -0.019 |        | 0.000175 |
| FSHB                                             | -0.154 | 0.115  | 0.000178 |

|                                                 |        |        |          |
|-------------------------------------------------|--------|--------|----------|
| ZNF202                                          | -0.529 |        | 0.000178 |
| NKX2-1                                          | -0.444 | -1.643 | 0.00018  |
| GCG                                             | -0.032 | 1.205  | 0.000196 |
| olanzapine                                      |        | -1.494 | 0.000196 |
| PKD1                                            | 0.213  | -0.277 | 0.000204 |
| PPARGC1A                                        | 1.307  | 0.045  | 0.000205 |
| TCR                                             |        | 1.931  | 0.000208 |
| pioglitazone                                    |        | -1.046 | 0.000209 |
| PRDM1                                           | -0.18  | 2.633  | 0.00021  |
| NR4A3                                           | -0.592 | 0.614  | 0.00021  |
| glucosamine                                     |        | -1.295 | 0.00021  |
| L-methionine                                    |        | -0.853 | 0.000211 |
| Hdac                                            |        | -2.02  | 0.000215 |
| FGF21                                           | -0.022 | 1.178  | 0.000219 |
| SU6656                                          |        | -1.508 | 0.000219 |
| simvastatin                                     |        | 0.137  | 0.000221 |
| TCF                                             |        |        | 0.000222 |
| methylmercury                                   |        | 1.739  | 0.000229 |
| SMAD4                                           | 0.839  | 1.745  | 0.00023  |
| NFYA                                            | -0.291 | 1.212  | 0.000232 |
| mir-451                                         |        | -2.646 | 0.000242 |
| ATF6                                            | 0.021  | 2.41   | 0.000252 |
| Ubiquitin                                       |        | -1.929 | 0.000254 |
| GW3965                                          |        | -0.156 | 0.000261 |
| ATP7B                                           | -0.408 | 0.277  | 0.00027  |
| chlorpromazine                                  |        | 0.003  | 0.00027  |
| GNB1                                            | 0.717  |        | 0.00027  |
| PRKACA                                          | -0.133 | 0.25   | 0.000275 |
| MAT1A                                           | -1.039 | 0.39   | 0.00028  |
| sorafenib                                       |        | -0.571 | 0.00028  |
| DYSF                                            | 0.07   |        | 0.000281 |
| CDC73                                           | 0.567  |        | 0.000283 |
| arachidonic acid                                |        | -0.084 | 0.000301 |
| poly rI:rC-RNA                                  |        | -0.275 | 0.000305 |
| NR0B2                                           | -0.424 | 0.893  | 0.000307 |
| 4-methylnitrosoamino-1-(3-pyridinyl)-1-butanone |        | 1.044  | 0.00031  |
| TP63                                            | -0.498 | 0.252  | 0.000321 |
| Zn2+                                            |        | 0.7    | 0.000321 |
| SOCS2                                           | 0.813  |        | 0.000321 |
| SOD2                                            | -0.412 | 1.091  | 0.000327 |
| FOLR1                                           | -0.319 |        | 0.000327 |
| TGFA                                            | -0.519 | 1.04   | 0.00034  |

|                              |        |        |          |
|------------------------------|--------|--------|----------|
| BAPTA-AM                     |        | -1.355 | 0.000343 |
| SEL1L                        | -0.519 | -2     | 0.000345 |
| NPAS2                        | -0.744 |        | 0.000345 |
| nonylphenol                  |        | 0.832  | 0.000358 |
| mono-(2-ethylhexyl)phthalate |        | 2.971  | 0.000375 |
| homocysteine                 |        | 1.922  | 0.000381 |
| phenylephrine                |        | 1.137  | 0.000381 |
| CD28                         | -0.044 | -0.011 | 0.000381 |
| nifedipine                   |        | -1.625 | 0.000381 |
| LHX1                         | 0.596  | 0.139  | 0.000408 |
| n-nitrosomethylbenzylamine   |        |        | 0.000417 |
| ALDH1A2                      | 0.164  | -0.971 | 0.00043  |
| mir-144                      |        | -2.646 | 0.000436 |
| salirasib                    |        | -0.893 | 0.00044  |
| CXCL12                       |        | 0.36   | 0.000441 |
| desmopressin                 |        | 0.616  | 0.000443 |
| POMC                         | -0.412 | 0.155  | 0.000443 |
| LDL                          |        | -0.348 | 0.000445 |
| CSF2                         | -0.178 | 0.421  | 0.000447 |
| GNA15                        | -0.129 |        | 0.000453 |
| BMP7                         | -0.299 | 1.377  | 0.000455 |
| Pka                          |        | 0.874  | 0.000455 |
| dicarbethoxydihydrocollidine |        | 1.063  | 0.000458 |
| A23187                       |        | 2.434  | 0.000458 |
| PTH                          | -0.225 | 1.364  | 0.000458 |
| CDH1                         | 0.675  | -0.132 | 0.000461 |
| KIAA1524                     | -0.66  | 0.497  | 0.000469 |
| topotecan                    |        | -1.046 | 0.00049  |
| phosphate                    |        | 1.303  | 0.000508 |
| F2                           | -1.522 | 3.807  | 0.000512 |
| ESRRA                        | -0.216 | 2.831  | 0.000519 |
| bile acid                    |        | -0.066 | 0.000529 |
| PTPRJ                        | 0.555  | 1.069  | 0.000554 |
| decitabine                   |        | 1.015  | 0.000558 |
| Mek                          |        | 3.025  | 0.000575 |
| IL17A                        | -0.249 | -0.072 | 0.000586 |
| ADRA1B                       | -0.428 |        | 0.000587 |
| methylnitrosourea            |        |        | 0.000588 |
| TGFB3                        | -0.179 | 0.324  | 0.000601 |
| ionomycin                    |        | 1.898  | 0.000602 |
| carbarylcholine              |        | 2.457  | 0.000612 |
| memantine                    |        | -0.453 | 0.000612 |
| 5-azacytidine                |        | 1.424  | 0.000618 |

|                                                  |        |        |          |
|--------------------------------------------------|--------|--------|----------|
| XBP1                                             | 0.511  | 0.233  | 0.000632 |
| L-histidine                                      |        | -1.819 | 0.000637 |
| miR-217-5p (and other miRNAs<br>w/seed ACUGCAU)  |        | -2.401 | 0.000637 |
| 5-fluorouracil                                   |        | -1.781 | 0.000639 |
| EZH2                                             | -0.163 | -1.49  | 0.000641 |
| RETNLB                                           | 0.031  | -0.75  | 0.000662 |
| TBX2                                             | 0.072  | -2.261 | 0.000662 |
| MAPK8                                            | 0.852  | 0.89   | 0.00069  |
| 11,12-epoxyeicosatrienoic acid                   |        | 0.146  | 0.000711 |
| HFE                                              | -0.312 | -1.964 | 0.000711 |
| HOXA9                                            | -0.541 | -0.867 | 0.000717 |
| EIF2AK3                                          | -0.366 | 2.333  | 0.000717 |
| GPER1                                            |        | 0.484  | 0.000736 |
| HR                                               | -0.451 | -1.195 | 0.000736 |
| MAP2K1/2                                         |        | 3.06   | 0.000742 |
| leukotriene D4                                   |        | 1.871  | 0.000742 |
| MITF                                             | 0.344  | -0.665 | 0.000745 |
| CREBBP                                           | -0.052 | -0.434 | 0.000746 |
| SREBF2                                           | 0.294  | 1.322  | 0.000751 |
| lysophosphatidic acid                            |        | 0.542  | 0.000751 |
| resveratrol                                      |        | 0.421  | 0.000753 |
| NOS2                                             | -0.206 | -0.115 | 0.000756 |
| RXRβ                                             | 0.146  | -0.068 | 0.000782 |
| BMS-690514                                       |        | -0.302 | 0.000792 |
| mir-182                                          |        | -0.745 | 0.000792 |
| bicalutamide                                     |        | -0.971 | 0.000792 |
| GTF2B                                            | -0.165 |        | 0.000792 |
| TERC                                             |        |        | 0.000792 |
| triiodothyronine, reverse                        |        | 1.067  | 0.000795 |
| mercury                                          |        | 0.192  | 0.000795 |
| miR-142-3p (and other miRNAs<br>w/seed GUAGUGU)  |        | -0.849 | 0.000795 |
| HTR2A                                            |        | -0.94  | 0.000795 |
| 6-cyano-7-nitroquinoxaline-2,3-<br>dione         |        | -1.214 | 0.000795 |
| acetazolamide                                    |        | -2     | 0.000795 |
| MRAS                                             | -0.587 |        | 0.000795 |
| beta-carotene                                    |        | -0.466 | 0.000802 |
| IL2                                              | -0.321 | 1.013  | 0.000818 |
| tyrphostin                                       |        | 0      | 0.000834 |
| miR-126a-3p (and other miRNAs<br>w/seed CGUACCG) |        | -1.34  | 0.000834 |
| P1,P4-Di(adenosine-5')                           |        | -1.387 | 0.000834 |



|                                                 |        |        |          |
|-------------------------------------------------|--------|--------|----------|
| tetraphosphate                                  |        |        |          |
| MEF2D                                           | 0.616  | 1.569  | 0.000904 |
| CLDN6                                           | -0.598 |        | 0.000904 |
| EPHB4                                           | -0.046 | 0.535  | 0.000931 |
| TP73                                            | 0.029  | 0.041  | 0.000935 |
| TGFB2                                           | -0.751 | 0.871  | 0.000949 |
| KLF2                                            | 0.109  | -0.474 | 0.000957 |
| PSEN2                                           | -0.287 | 0.809  | 0.000971 |
| bardoxolone                                     |        | 0      | 0.00101  |
| CGS 21680                                       |        | -0.485 | 0.00101  |
| miR-182-5p (and other miRNAs<br>w/seed UUGGCAA) |        | -0.515 | 0.00105  |
| ZBTB17                                          | 0.161  | 1.633  | 0.00107  |
| phencyclidine                                   |        | 1.763  | 0.00115  |
| fluoride                                        |        | 0.842  | 0.00115  |
| PER2                                            | 0.596  | 0      | 0.00115  |
| hormone                                         |        |        | 0.00115  |
| Calcineurin protein(s)                          |        | 1.192  | 0.00116  |
| indomethacin                                    |        | 1.004  | 0.00117  |
| CETP                                            |        | 2.17   | 0.00118  |
| mannitol                                        |        | 0.381  | 0.00118  |
| STAT4                                           | -0.115 | 1.909  | 0.00121  |
| ascorbic acid                                   |        | 0.473  | 0.00122  |
| PDGFB                                           | -0.164 | 0.724  | 0.00125  |
| ADAM10                                          | -0.863 |        | 0.0013   |
| NRG1                                            |        | 1.398  | 0.00136  |
| NEDD9                                           | 0.446  | 1.508  | 0.00137  |
| R5020                                           |        | 1.238  | 0.00139  |
| tributyrin                                      |        | 0.477  | 0.00139  |
| SMAD3                                           | -0.347 | 0.533  | 0.00141  |
| FSHR                                            | -0.413 | -0.847 | 0.00143  |
| FOXO3                                           | 0.866  | 3.157  | 0.00144  |
| geldanamycin                                    |        | 0.329  | 0.0015   |
| TOX                                             | -0.045 |        | 0.00152  |
| HAO1                                            | -0.891 |        | 0.00152  |
| mir-183                                         |        |        | 0.00152  |
| GC                                              | -1.548 |        | 0.00152  |
| SLC12A6                                         | 0.683  |        | 0.00152  |
| NECTIN1                                         | 0      |        | 0.00152  |
| BB-2116                                         |        |        | 0.00152  |
| FGF4                                            | -0.366 | -0.114 | 0.00155  |
| HSPA5                                           | 0.649  | -1.216 | 0.00155  |
| fluconazole                                     |        | -1.501 | 0.00155  |

|                                                             |        |        |         |
|-------------------------------------------------------------|--------|--------|---------|
| SP600125                                                    |        | -1.705 | 0.00155 |
| omeprazole                                                  |        | -0.609 | 0.00157 |
| App                                                         | -0.406 | 1.177  | 0.00157 |
| MBD2                                                        | -0.344 | -0.277 | 0.00157 |
| GLI1                                                        | -0.459 | 0.043  | 0.0016  |
| miR-122-5p (miRNAs w/seed<br>GGAGUGU)                       |        | -1.197 | 0.00167 |
| 8-chlorophenylthio-adenosine 3',5'-<br>cyclic monophosphate |        | 2.977  | 0.00169 |
| TEF                                                         | -0.398 | 1.214  | 0.0017  |
| AGRP                                                        | -0.1   |        | 0.0017  |
| S100P                                                       |        |        | 0.0017  |
| tanespimycin                                                |        | 0.032  | 0.00172 |
| glutamine                                                   |        | -0.272 | 0.00173 |
| SOD1                                                        | 0.46   | 0.152  | 0.00173 |
| MLXIPL                                                      | 0.071  | 0.75   | 0.00175 |
| RXRG                                                        | -0.298 |        | 0.00175 |
| H89                                                         |        | 0.631  | 0.00177 |
| TRH                                                         | -0.559 | 1.977  | 0.00177 |
| IRS2                                                        | 0.24   | -0.383 | 0.00177 |
| eicosapentenoic acid                                        |        | 1.002  | 0.00178 |
| thiazolidinedione                                           |        | 0.871  | 0.00181 |
| glutamyl-Se-methylselenocysteine                            |        | -1.134 | 0.00181 |
| gefitinib                                                   |        | -0.312 | 0.00183 |
| CD 437                                                      |        | -3.281 | 0.00184 |
| let-7                                                       |        | 0.197  | 0.00185 |
| trichloroethylene                                           |        | 1.846  | 0.00189 |
| benzene                                                     |        | 1.846  | 0.00189 |
| ADRB3                                                       | -0.37  | 0.104  | 0.00193 |
| cyclooxygenase                                              |        | -0.577 | 0.00193 |
| mir-221                                                     |        | -0.744 | 0.00193 |
| TMBIM6                                                      | 0.345  | -1.638 | 0.00193 |
| CFB                                                         | 0.632  | -2.449 | 0.00193 |
| sodium arsenite                                             |        | 2.048  | 0.00194 |
| capsaicin                                                   |        | 0.143  | 0.00194 |
| phenethyl isothiocyanate                                    |        |        | 0.00202 |
| benzo(a)pyrene                                              |        | 0.847  | 0.00204 |
| mir-21                                                      |        | 0.59   | 0.00205 |
| CEBPD                                                       | 1.607  | -1.498 | 0.00206 |
| ERBB3                                                       | 0.199  | -0.073 | 0.00208 |
| KITLG                                                       | 0.641  | 2.347  | 0.00209 |
| docosahexaenoic acid                                        |        | -0.789 | 0.00209 |
| NR4A2                                                       | -0.143 | 1.929  | 0.00212 |

|                                                |        |        |         |
|------------------------------------------------|--------|--------|---------|
| BNIP3L                                         | 0.538  | 1.604  | 0.00213 |
| FANCC                                          | -0.394 |        | 0.00213 |
| MAP3K12                                        | 0.894  | 1.154  | 0.00217 |
| meclizine                                      |        | 1      | 0.00217 |
| NCK1                                           | 0.044  | -0.831 | 0.00217 |
| benfluorex                                     |        | -1     | 0.00217 |
| H6PD                                           | 0.361  | -1     | 0.00217 |
| ADCY5                                          |        | -1     | 0.00217 |
| CYB5R4                                         | 0.211  | -1.981 | 0.00217 |
| PTBP1                                          | -0.061 |        | 0.00217 |
| TAF10                                          | 0.124  |        | 0.00217 |
| CSNK2A2                                        | 0.567  |        | 0.00217 |
| SRD5A1                                         |        |        | 0.00217 |
| mir-1                                          |        | 0.611  | 0.00227 |
| Nr1h                                           |        | -2.016 | 0.00227 |
| PRKCE                                          | 0.197  | 0.477  | 0.00236 |
| fluoxetine                                     |        | -0.335 | 0.00236 |
| ouabain                                        |        | 3.051  | 0.00236 |
| metformin                                      |        | -0.456 | 0.00237 |
| salicylic acid                                 |        | 0.439  | 0.00238 |
| Growth hormone                                 |        | 0.885  | 0.00241 |
| PAX7                                           | -0.226 | 0.13   | 0.00241 |
| NFKB1                                          | 0.01   | 1.186  | 0.00243 |
| ADORA2A                                        | -0.658 | 0.833  | 0.00255 |
| MAP3K1                                         | 0.184  | 1.269  | 0.00258 |
| dimethylnitrosamine                            |        | 0.788  | 0.00263 |
| P38 MAPK                                       |        | 0.785  | 0.00264 |
| Tgf beta                                       |        | 1.446  | 0.00264 |
| PDGF-AA                                        |        | 0.762  | 0.00266 |
| PER1                                           | 0.744  | -0.339 | 0.00266 |
| BTRC                                           | -0.666 | -1.012 | 0.00266 |
| FOXA3                                          | -0.381 |        | 0.00266 |
| E. coli serotype 0127B8                        |        |        |         |
| lipopolysaccharide                             |        | -1.383 | 0.00268 |
| calcitriol                                     |        | 2.767  | 0.00272 |
| MAX                                            | -0.079 | 0.555  | 0.00282 |
| NRL                                            | -0.671 | 0.056  | 0.00286 |
| 5-hydroxytryptamine                            |        | 1.431  | 0.00291 |
| clozapine                                      |        | 1.027  | 0.00291 |
| miR-17-5p (and other miRNAs<br>w/seed AAAGUGC) |        | -1.268 | 0.00291 |
| aldosterone                                    |        | 1.645  | 0.00292 |
| MBD1                                           | 0.59   |        | 0.00303 |

|                                                     |        |        |         |
|-----------------------------------------------------|--------|--------|---------|
| isobutylmethylxanthine                              |        | -0.491 | 0.00303 |
| miR-18a-5p (and other miRNAs<br>w/seed AAGGUGC)     |        | 0      | 0.00305 |
| pCPT-cAMP                                           |        | 1.427  | 0.00307 |
| RANBP9                                              | -0.146 | 1.4    | 0.00307 |
| CRY1                                                | 0.038  | -0.254 | 0.00307 |
| farglitazar                                         |        | -0.447 | 0.00307 |
| miR-30a-3p (and other miRNAs<br>w/seed UUUCAGU)     |        | -1.287 | 0.00307 |
| 2-amino-1-methyl-6-phenylimidazo-<br>4-5-b-pyridine |        | 3.317  | 0.00325 |
| 2-deoxyglucose                                      |        | 2.597  | 0.00325 |
| Collagen(s)                                         |        | 1      | 0.00325 |
| SIRT1                                               | 0.573  | -0.222 | 0.0033  |
| HDAC1                                               | 0.005  | -0.088 | 0.00354 |
| vincristine                                         |        | 0.707  | 0.00358 |
| ATF1                                                | 0.4    | -1.309 | 0.00358 |
| GnRH analog                                         |        | 0.082  | 0.0037  |
| GNRH                                                |        | 2.416  | 0.0038  |
| MNT                                                 | -0.361 | 0      | 0.0038  |
| RHOJ                                                | 0.436  |        | 0.0038  |
| SOX2                                                | 0.002  | 0.535  | 0.00382 |
| gemfibrozil                                         |        | 2.386  | 0.00384 |
| XDH                                                 | 0.063  | -1.32  | 0.00387 |
| GATA3                                               | -0.003 | -0.758 | 0.00391 |
| AICAR                                               |        | -0.44  | 0.00397 |
| SRF                                                 | 0.148  | 0.938  | 0.00398 |
| arsenic trioxide                                    |        | 1.725  | 0.004   |
| salmonella minnesota R595<br>lipopolysaccharides    |        | 0.229  | 0.00406 |
| lithocholic acid                                    |        | 0.708  | 0.00409 |
| pravastatin                                         |        | 1.242  | 0.00424 |
| epigallocatechin-gallate                            |        | 0.026  | 0.00428 |
| IKBKB                                               | -0.746 | 0.886  | 0.00429 |
| mir-210                                             |        | -2.173 | 0.00433 |
| E2F1                                                | -0.307 | -0.26  | 0.0044  |
| PLN                                                 | -0.733 |        | 0.0044  |
| SNAI2                                               | -0.031 | -0.737 | 0.00443 |
| LMNB1                                               | -0.164 |        | 0.00443 |
| IKBKG                                               | -0.595 | 2.142  | 0.00446 |
| CDX2                                                | -0.414 | 1.203  | 0.00447 |
| atorvastatin                                        |        | -0.629 | 0.00449 |
| vitamin K3                                          |        | 2.176  | 0.00459 |
| LIN28A                                              | -0.375 | 0.412  | 0.00459 |

|                                                 |        |        |         |
|-------------------------------------------------|--------|--------|---------|
| miR-103-3p (and other miRNAs<br>w/seed GCAGCAU) |        | -0.179 | 0.00459 |
| MST1R                                           | -0.11  | -0.618 | 0.00459 |
| retinol                                         |        | -0.816 | 0.00459 |
| SPTLC2                                          | 0.003  | -2.425 | 0.00459 |
| 2-mercaptoethanol                               |        | 1.981  | 0.00459 |
| L-type Calcium Channel                          |        | 0      | 0.00459 |
| L-phenylalanine                                 |        | -0.152 | 0.00459 |
| miR-320b (and other miRNAs<br>w/seed AAAGCUG)   |        | -1.176 | 0.00459 |
| PGK1                                            | 0.282  |        | 0.00459 |
| VDR                                             | 0.313  | 2.85   | 0.00462 |
| CCND1                                           | 0.45   | -0.926 | 0.00467 |
| RAC1                                            | -0.376 | 1.072  | 0.0048  |
| CYP1A2                                          | -1.543 | 2.309  | 0.00482 |
| VitaminD3-VDR-RXR                               |        | 0.98   | 0.00482 |
| 25-hydroxycholesterol                           |        | -1.071 | 0.00482 |
| pimagedine                                      |        | -0.285 | 0.00487 |
| NR2F1                                           | 0.038  | -1.016 | 0.00487 |
| 22(R)-hydroxycholesterol                        |        | -1.938 | 0.00487 |
| VEGFA                                           | -0.237 | 2.782  | 0.00506 |
| SCD                                             | 0.842  | -0.337 | 0.00507 |
| N-Ac-Leu-Leu-norleucinal                        |        | 0.173  | 0.0051  |
| FADD                                            | -0.471 | 0.04   | 0.0051  |
| CRY2                                            | 0.025  | 0.317  | 0.0051  |
| estrone                                         |        | -1.964 | 0.0051  |
| ATF2                                            | 0.402  | 0.758  | 0.00519 |
| NR1H2                                           | -0.018 | -0.411 | 0.0052  |
| UPF2                                            | 0.878  | 0.103  | 0.00523 |
| MBD3                                            | 0.138  |        | 0.00523 |
| Ro41-5253                                       |        | 0.752  | 0.00528 |
| MAP2K5                                          | 0.093  | 0.562  | 0.00528 |
| Rar                                             |        | 0      | 0.00528 |
| ZMPSTE24                                        | -0.025 | -1.672 | 0.00528 |
| amitriptyline                                   |        | -2.588 | 0.00528 |
| paraquat                                        |        | 0      | 0.00532 |
| KN-62                                           |        | 0.933  | 0.00541 |
| 4-hydroxynonenal                                |        | 0.657  | 0.00541 |
| RCE1                                            | -0.02  |        | 0.00544 |
| dextran sulfate                                 |        |        | 0.00546 |
| STAT5A                                          | -0.2   | 1.589  | 0.00551 |
| obatoclox                                       |        |        | 0.00556 |
| RS1                                             | 0.02   |        | 0.00556 |

|                                   |        |        |         |
|-----------------------------------|--------|--------|---------|
| CA4                               | -0.416 |        | 0.00556 |
| HMG1                              |        |        | 0.00556 |
| NCK2                              | -0.576 |        | 0.00556 |
| APAF1                             | -0.088 |        | 0.00556 |
| GCLC                              | 0.42   |        | 0.00556 |
| SLIT2                             | 0.215  |        | 0.00556 |
| CITED1                            | 0.008  |        | 0.00556 |
| PCYT1A                            | -0.571 |        | 0.00556 |
| ibotenic acid                     |        |        | 0.00556 |
| apamin                            |        |        | 0.00556 |
| ARNT                              | -0.508 | 1.067  | 0.00567 |
| nocodazole                        |        | -0.486 | 0.00567 |
| RELA                              | 0.221  | 1.277  | 0.00571 |
| cigarette smoke                   |        | -0.135 | 0.00577 |
| deoxycholate                      |        | 1.119  | 0.00581 |
| iron                              |        | -1.095 | 0.00581 |
| NCOA2                             | -0.333 | -1.212 | 0.00581 |
| AIRE                              | -0.345 | -1.938 | 0.00581 |
| TNFSF11                           | -0.298 | 0.565  | 0.00585 |
| 2,4,5,2',4',5'-hexachlorobiphenyl |        | 0.167  | 0.00586 |
| MYB                               | -0.076 | -0.242 | 0.00586 |
| TCF3                              | -0.16  | -0.641 | 0.00591 |
| brefeldin A                       |        | 1.363  | 0.00606 |
| APOA1                             | -4.404 | -0.675 | 0.00606 |
| KLF6                              | 1.023  | -1     | 0.00606 |
| mir-17                            |        | -1.928 | 0.00606 |
| ATP-gamma-S                       |        |        | 0.00609 |
| NRG2                              |        |        | 0.00609 |
| HIC1                              | -0.307 | 0.137  | 0.00611 |
| caffeic acid phenethyl ester      |        | -1.462 | 0.00619 |
| INSIG1                            |        | -0.51  | 0.00631 |
| APOE                              | -1.25  | -0.296 | 0.00642 |
| RUNX1                             | -0.514 | 0.767  | 0.00646 |
| FOXO4                             | -0.373 | 0.832  | 0.00662 |
| NTRK2                             | -0.304 | -0.378 | 0.00662 |
| amiodarone                        |        | 0.707  | 0.00663 |
| KAT2B                             | -0.44  | -1.016 | 0.00663 |
| HBEGF                             | 0.953  | -1.939 | 0.00663 |
| PTK2B                             | 0.633  | 1.246  | 0.00664 |
| GLP-1-(7-34)-amide                |        | 0.364  | 0.00664 |
| 1-methyl-4-phenylpyridinium       |        | 0.059  | 0.00664 |
| MIR124                            |        | -0.816 | 0.00664 |
| Hmga1                             | 0.088  | -0.513 | 0.00666 |

|                                               |        |        |         |
|-----------------------------------------------|--------|--------|---------|
| CNTF                                          | 0      | 1.449  | 0.00671 |
| plicamycin                                    |        | -0.675 | 0.00671 |
| GnRH-A                                        |        | 3.152  | 0.00692 |
| NCOA1                                         | 0.584  | 0.268  | 0.00692 |
| FN1                                           | -0.254 | -0.181 | 0.00694 |
| CDK9                                          | 0.227  | 0      | 0.00704 |
| tetrodotoxin                                  |        | -0.158 | 0.00704 |
| PPP3CA                                        | 0.399  |        | 0.00707 |
| CAR ligand-CAR-Retinoic acid-RXR $\alpha$     |        | 0.57   | 0.00714 |
| panobinostat                                  |        | 0.478  | 0.00714 |
| LRP5                                          | -0.19  | 0.378  | 0.00714 |
| AZGP1                                         | -1.336 | -0.54  | 0.00714 |
| ADIPOQ                                        | 0.079  | -0.852 | 0.00723 |
| CD44                                          | -0.022 | 0.013  | 0.00743 |
| SB 216763                                     |        | 1.234  | 0.00746 |
| ESR2                                          | -0.053 | 0.957  | 0.00773 |
| CHRM1                                         | -0.129 | 1.513  | 0.00793 |
| ASIP                                          | -0.065 | 1.213  | 0.00793 |
| clotrimazole                                  |        | 0.162  | 0.00793 |
| nimodipine                                    |        | -0.447 | 0.00793 |
| hyperforin                                    |        | -0.447 | 0.00793 |
| miR-19b-3p (and other miRNAs w/seed GUGCAA)   |        | -1.252 | 0.00793 |
| prazosin                                      |        | -1.342 | 0.00793 |
| U18666A                                       |        | -2.236 | 0.00793 |
| IRAK4                                         | -0.14  |        | 0.00793 |
| GHRL                                          | -0.045 | 1.78   | 0.00799 |
| N-methyl-D-aspartate                          |        | -0.058 | 0.00799 |
| TCF7                                          | -0.54  | -0.728 | 0.00799 |
| 3,3'-diindolylmethane                         |        | -0.737 | 0.00799 |
| Am 580                                        |        | 0.375  | 0.0083  |
| MSX2                                          | 0.063  | 0.348  | 0.0083  |
| PRKAA2                                        |        | -0.104 | 0.0083  |
| sphingosylphosphocholine                      |        | 1.067  | 0.00835 |
| LIMS1                                         | -0.254 | 1      | 0.00835 |
| miR-199a-3p (and other miRNAs w/seed CAGUAGU) |        | 0.28   | 0.00835 |
| 8,9-epoxyeicosatrienoic acid                  |        | 0.152  | 0.00835 |
| nicardipine                                   |        | -0.805 | 0.00835 |
| ARHGDI1                                       | -0.006 | -2     | 0.00835 |
| phosphatidylcholine                           |        |        | 0.00835 |
| FGF3                                          | -0.419 |        | 0.00835 |
| BCAR1                                         | 0.035  |        | 0.00835 |

|                                                  |        |        |         |
|--------------------------------------------------|--------|--------|---------|
| RP 73401                                         |        |        | 0.00835 |
| CYP1B1                                           | -0.264 | 2.496  | 0.00836 |
| TCF12                                            | 0.441  | -0.723 | 0.00836 |
| medroxyprogesterone acetate                      |        | 2.223  | 0.00839 |
| rifampin                                         |        | -0.302 | 0.00855 |
| LDLR                                             | -0.303 | -1.728 | 0.0087  |
| IL1A                                             | 0      | -0.651 | 0.00872 |
| CSF1                                             | -0.355 | -0.075 | 0.00874 |
| BMP2                                             | -0.008 | -0.413 | 0.00883 |
| phorbol 12,13-didecanoate                        |        | 1.587  | 0.00902 |
| carbohydrate                                     |        | 1.134  | 0.00902 |
| PLAT                                             | 0.618  | 0.478  | 0.00902 |
| GDF9                                             | -0.103 | -0.846 | 0.00902 |
| methyl methanesulfonate                          |        | 2.573  | 0.00911 |
| flucinolone acetonide                            |        | 0.632  | 0.00911 |
| caffeine                                         |        | -1.135 | 0.00911 |
| HNRNPA2B1                                        | 0.89   |        | 0.00922 |
| 1-(carboxymethylthio)tetradecane                 |        | 0.647  | 0.00928 |
| NFIA                                             | 0.835  | -0.277 | 0.00928 |
| C5                                               | -1.088 | 0.274  | 0.00938 |
| SPDEF                                            | -0.466 | -1.585 | 0.00938 |
| ARNTL                                            | -0.872 | 0.96   | 0.00945 |
| SUPT16H                                          | 0.045  |        | 0.00945 |
| 15-deoxy-delta-12,14 -PGJ 2                      |        | -0.027 | 0.00957 |
| PTPN1                                            | 1.017  | 0.547  | 0.00957 |
| 3-methylcholanthrene                             |        | -0.315 | 0.00957 |
| NGF                                              | -0.173 | -0.075 | 0.00958 |
| REL                                              | -0.153 | 0.187  | 0.00973 |
| ERK1/2                                           |        | 0.902  | 0.00976 |
| beta-naphthoflavone                              |        | 0.64   | 0.00977 |
| RBPJ                                             | -0.591 | 0.37   | 0.0102  |
| GATA1                                            | -0.124 | -0.481 | 0.0102  |
| propranolol                                      |        | -1.445 | 0.0103  |
| SUMO2                                            |        | -2.36  | 0.0103  |
| LIF                                              | -0.624 | 1.787  | 0.0103  |
| tacrolimus                                       |        | 0.961  | 0.0103  |
| miR-125b-5p (and other miRNAs<br>w/seed CCCUGAG) |        | -0.658 | 0.0103  |
| CNR1                                             | -0.097 | -0.074 | 0.0105  |
| GDF2                                             | -0.584 | 0.092  | 0.0107  |
| ANXA7                                            | 0.552  | -0.246 | 0.0107  |
| STAT6                                            | 0.73   | -1.332 | 0.011   |
| ethionine                                        |        | 0.588  | 0.011   |



|                                                  |        |        |        |
|--------------------------------------------------|--------|--------|--------|
| retinoid                                         |        | 0.563  | 0.011  |
| CD247                                            | -0.236 | 0.535  | 0.0111 |
| MEF2C                                            | 0.497  | 0.286  | 0.0111 |
| EPAS1                                            | -0.067 | 0.05   | 0.0111 |
| IL6R                                             | -0.376 | -0.878 | 0.0114 |
| apomorphine                                      |        | 1.579  | 0.0114 |
| mir-15                                           |        | 0.896  | 0.0114 |
| MUC1                                             | 0.213  | 0.127  | 0.0114 |
| ABCB4                                            | -0.589 | -1.005 | 0.0114 |
| glucagon                                         |        | -0.038 | 0.0115 |
| hydrocortisone                                   |        | 1.553  | 0.0115 |
| CD24                                             |        | 3.207  | 0.0116 |
| CYP27A1                                          | 0.202  | 0.6    | 0.0117 |
| MLX                                              | 0.095  | 0.418  | 0.0117 |
| ESRRG                                            | -0.416 | 0.261  | 0.0117 |
| mir-205                                          |        | -0.895 | 0.0117 |
| TAF1                                             |        |        | 0.0117 |
| mir-126                                          |        |        | 0.0117 |
| tert-butyl-hydroquinone                          |        | 2.318  | 0.0117 |
| SMARCA4                                          | 0.578  | -0.209 | 0.0119 |
| MEF2A                                            | 0.849  | 1.407  | 0.0123 |
| SPRY2                                            | -0.241 | 0      | 0.0123 |
| miR-200b-3p (and other miRNAs<br>w/seed AAUACUG) |        | -0.41  | 0.0123 |
| TGM2                                             | 0.53   | -0.3   | 0.0123 |
| losartan potassium                               |        | -2.175 | 0.0126 |
| IHH                                              | 0.13   | 1.446  | 0.0126 |
| finasteride                                      |        | 0.928  | 0.0126 |
| POSTN                                            | -0.039 | -0.44  | 0.0126 |
| NAB2                                             | 0.903  | -1.131 | 0.0126 |
| NFIX                                             | -0.448 | -1.671 | 0.0126 |
| EIF4EBP1                                         | 0.309  | -1.732 | 0.0126 |
| MECOM                                            | -0.586 |        | 0.0126 |
| cetuximab                                        |        |        | 0.0127 |
| RNF187                                           | 0.273  |        | 0.0127 |
| FOXE3                                            | -0.338 |        | 0.0127 |
| Gpcr                                             |        |        | 0.0127 |
| KLB                                              | -0.422 |        | 0.0127 |
| CREB3L4                                          | -0.287 |        | 0.0127 |
| ghrelin                                          |        |        | 0.0127 |
| PSMB9                                            | -0.155 |        | 0.0127 |
| ERN2                                             | -0.303 |        | 0.0127 |
| SMC3                                             | 0.372  |        | 0.0127 |

|                              |        |        |        |
|------------------------------|--------|--------|--------|
| HNF4G                        | -0.638 |        | 0.0127 |
| MAD2L2                       | -0.066 |        | 0.0127 |
| RHOC                         | 0.098  |        | 0.0127 |
| catechol                     |        |        | 0.0127 |
| PRNP                         | 0.387  | 1.109  | 0.0132 |
| MTA1                         | 0.165  | -0.696 | 0.0132 |
| 5,6-epoxyeicosatrienoic acid |        |        | 0.0132 |
| CHD5                         |        |        | 0.0132 |
| L3MBTL1                      |        |        | 0.0132 |
| potassium channel            |        |        | 0.0132 |
| PACS2                        | 0.342  |        | 0.0132 |
| SRA1                         | 0.021  |        | 0.0132 |
| GFRA1                        | -0.259 |        | 0.0132 |
| MAPK8IP2                     | -0.349 |        | 0.0132 |
| OAZ1                         | -0.33  |        | 0.0132 |
| ULK1                         | -0.163 |        | 0.0132 |
| RFX4                         |        |        | 0.0132 |
| CELA1                        | 0.604  |        | 0.0132 |
| PMAIP1                       |        |        | 0.0132 |
| NMB                          | -0.194 |        | 0.0132 |
| mir-489                      |        |        | 0.0132 |
| PRSS2                        |        |        | 0.0132 |
| HCRT                         | -0.06  |        | 0.0132 |
| TCF20                        | -0.516 |        | 0.0132 |
| MXD4                         | -0.22  |        | 0.0132 |
| PCSK6                        | 0.039  |        | 0.0132 |
| HNRNPL                       | 0.15   |        | 0.0132 |
| GABRG2                       | -0.184 |        | 0.0132 |
| AKAP13                       |        |        | 0.0132 |
| IMPACT                       | 0.552  |        | 0.0132 |
| GPS1                         | -0.081 |        | 0.0132 |
| FRAT1                        | -0.125 |        | 0.0132 |
| MID1                         | -0.456 |        | 0.0132 |
| BUB1B                        | -0.325 |        | 0.0132 |
| buformin                     |        |        | 0.0132 |
| palytoxin                    |        |        | 0.0132 |
| marimastat                   |        |        | 0.0132 |
| phenformin                   |        |        | 0.0132 |
| teleocidins                  |        |        | 0.0132 |
| D-lysergic acid diethylamide |        |        | 0.0132 |
| trans-4-phenylbut-3-en-2-one |        |        | 0.0132 |
| protamine zinc insulin       |        |        | 0.0132 |
| vigabatrin                   |        |        | 0.0132 |

|                                           |        |        |        |
|-------------------------------------------|--------|--------|--------|
| KB-R7785                                  |        |        | 0.0132 |
| NOTCH1                                    | -0.191 | 1.305  | 0.0132 |
| vitamin E                                 |        | 0.458  | 0.0134 |
| colchicine                                |        | 1.778  | 0.0134 |
| fish oils                                 |        | -0.728 | 0.0134 |
| WNT1                                      | -0.417 | -0.383 | 0.0137 |
| PIAS3                                     | -0.425 | 1.948  | 0.0137 |
| [D-Ala2,N-Me-Phe4,Gly5-ol]-<br>Enkephalin |        | 1.266  | 0.0137 |
| TFF3                                      | 0.083  | 0.849  | 0.0137 |
| tolbutamide                               |        | -0.762 | 0.0137 |
| OSMR                                      | 0.737  | -0.849 | 0.0137 |
| DUSP14                                    | -0.021 | -1     | 0.0137 |
| AURKA                                     | -0.529 | -1.004 | 0.0137 |
| NPC1L1                                    |        | -2     | 0.0137 |
| TAF5                                      |        |        | 0.0137 |
| HGS                                       | 0.037  |        | 0.0137 |
| dichloroacetic acid                       |        |        | 0.0137 |
| CHUK                                      | 0.127  | 1.26   | 0.0138 |
| APC                                       | -0.202 | 0.431  | 0.0138 |
| STAT5B                                    | 0.573  | 1.041  | 0.0139 |
| nitric oxide                              |        | -0.557 | 0.0144 |
| MAPK1                                     | -0.229 | 2.332  | 0.0148 |
| ELK1                                      | -0.359 | 1.16   | 0.0152 |
| SUMO3                                     | -0.465 | -2.36  | 0.0152 |
| ursodeoxycholic acid                      |        | -0.043 | 0.0155 |
| HRG                                       | -0.866 | 1.276  | 0.0156 |
| butylated hydroxyanisol                   |        | 1.243  | 0.0156 |
| TRPV4                                     | -0.033 | 1.011  | 0.0156 |
| indole-3-carbinol                         |        | 0.537  | 0.0156 |
| mir-29                                    |        | 0      | 0.0156 |
| CTBP1                                     | 0.067  | -0.218 | 0.0156 |
| HSD17B4                                   | 0.442  | -2.63  | 0.0156 |
| HBD                                       | 0.21   | -1.89  | 0.0157 |
| TSC2                                      | -0.276 | -1.984 | 0.0157 |
| SERPINF1                                  | -1.323 | -1.969 | 0.0158 |
| CALCA                                     | -0.303 | -0.117 | 0.0158 |
| BMP6                                      | 0.64   | -0.594 | 0.0158 |
| morphine                                  |        | -0.184 | 0.0158 |
| EP300                                     |        | 0.825  | 0.0164 |
| mir-8                                     |        | 1.262  | 0.0165 |
| 1-naphthylisothiocyanate                  |        | 0.447  | 0.0165 |
| cobalt                                    |        | 0.391  | 0.0165 |

|                                                |        |        |        |
|------------------------------------------------|--------|--------|--------|
| acetaldehyde                                   |        | 0.128  | 0.0165 |
| aroclor 1254                                   |        | -0.625 | 0.0165 |
| spermine nitric oxide complex                  |        | -0.737 | 0.0165 |
| PTPRE                                          | -0.068 | -1.342 | 0.0165 |
| pentobarbital                                  |        | -1.379 | 0.0165 |
| HNF4α dimer                                    |        | -1.387 | 0.0165 |
| mir-122                                        |        |        | 0.0165 |
| BAG1                                           | 0.871  |        | 0.0165 |
| reactive oxygen species                        |        | 1.057  | 0.0165 |
| (+)-MK-801                                     |        | -0.296 | 0.0166 |
| FBN1                                           | -0.574 | 1.516  | 0.0166 |
| Rp-cAMPS                                       |        | 0.928  | 0.0166 |
| SMARCE1                                        | 0.507  | 0.277  | 0.0166 |
| SCP2                                           | 0.847  | -0.392 | 0.0166 |
| leuprolide                                     |        | -0.896 | 0.0166 |
| naloxone                                       |        | -2.297 | 0.0166 |
| ETS                                            |        |        | 0.0166 |
| ACKR1                                          | -0.589 |        | 0.0166 |
| mycophenolic acid                              |        | 1.546  | 0.0168 |
| EIF4E                                          | 0.091  | 1.431  | 0.0168 |
| BRCA1                                          | -0.766 | 1.185  | 0.0168 |
| Tnf (family)                                   |        | -0.182 | 0.0168 |
| REST                                           | 0.755  | 2.388  | 0.017  |
| sphingosine-1-phosphate                        |        | 1.015  | 0.0173 |
| MEN1                                           | 0.422  | -0.651 | 0.0174 |
| 4-tert-octylphenol                             |        | -1     | 0.0174 |
| IFRD1                                          | 0.757  | -1.294 | 0.0174 |
| Focal adhesion kinase                          |        | -1.937 | 0.0174 |
| tetracycline                                   |        | -1.855 | 0.0178 |
| di(2-ethylhexyl) phthalate                     |        | 1.599  | 0.018  |
| ADCYAP1                                        | -0.251 | 0.403  | 0.018  |
| mir-10                                         |        | 1.003  | 0.0183 |
| IL24                                           | -0.436 | 0.333  | 0.0183 |
| SHH                                            | -0.235 | 0.526  | 0.0184 |
| let-7a-5p (and other miRNAs w/seed<br>GAGGUAG) |        | -2.219 | 0.0184 |
| carboplatin                                    |        | 0.777  | 0.0184 |
| TCF4                                           | 1.012  | -0.122 | 0.0184 |
| phenacetin                                     |        | 1.265  | 0.0186 |
| LPL                                            | 0.106  | 0.095  | 0.0186 |
| ETV5                                           | -0.052 | -0.152 | 0.0186 |
| cyclophosphamide                               |        | 1.351  | 0.0188 |
| HSF2                                           | -0.095 | 1.982  | 0.0196 |

|                                                 |        |        |        |
|-------------------------------------------------|--------|--------|--------|
| arginine                                        |        | 1      | 0.0196 |
| dithiothreitol                                  |        | 0.834  | 0.0196 |
| cyanocobalamin                                  |        | -0.447 | 0.0196 |
| ICMT                                            | 0.345  |        | 0.0196 |
| CDKN1A                                          | 0.241  | 0.874  | 0.0203 |
| MXD1                                            | 0.032  | 1.987  | 0.0207 |
| EPHB1                                           |        | 1.987  | 0.0207 |
| PDGFRB                                          | 0.31   | 1.236  | 0.0207 |
| RPTOR                                           |        | 1.131  | 0.0207 |
| ANKRD17                                         | 0.971  | 1      | 0.0207 |
| NMNAT1                                          | 0.21   | 0.218  | 0.0207 |
| 14,15-epoxyeicosatrienoic acid                  |        | 0.152  | 0.0207 |
| MMP7                                            | -0.1   | -0.218 | 0.0207 |
| bile salt                                       |        | -0.218 | 0.0207 |
| HLF                                             | 0.485  | -0.577 | 0.0207 |
| mir-199                                         |        | -0.975 | 0.0207 |
| miR-375-3p (and other miRNAs<br>w/seed UUGUUCG) |        | -1.257 | 0.0207 |
| HIST2H3C (includes others)                      | -0.423 |        | 0.0207 |
| HIST1H4A (includes others)                      |        |        | 0.0207 |
| mir-103                                         |        |        | 0.0207 |
| EIF2AK2                                         | -0.011 | 1.193  | 0.021  |
| GSK3B                                           | 0.488  | -0.992 | 0.021  |
| SRC                                             | 0.155  | 1.031  | 0.0211 |
| guanidinopropionic acid                         |        | 1.354  | 0.0213 |
| doxycycline                                     |        | 0.166  | 0.0213 |
| SOX9                                            | -0.252 | -1.18  | 0.0213 |
| glutathione                                     |        | -2.051 | 0.0213 |
| VHL                                             | -0.377 | 0.727  | 0.0214 |
| NTRK1                                           |        | 1.342  | 0.0215 |
| MAPK7                                           | -0.14  | 0.869  | 0.0215 |
| TFAM                                            | 0.316  | 0.816  | 0.0215 |
| bufalin                                         |        | 0.447  | 0.0215 |
| TWIST2                                          | -0.453 | 0.418  | 0.0215 |
| COMMD1                                          | 0.624  | 0      | 0.0215 |
| everolimus                                      |        | -0.813 | 0.0215 |
| L-tryptophan                                    |        | -1.709 | 0.0215 |
| MEF2                                            |        |        | 0.0215 |
| CDX1                                            | -0.541 |        | 0.0215 |
| NFATC2                                          | -0.17  | 1.594  | 0.0216 |
| nitroprusside                                   |        | 1.006  | 0.0218 |
| miR-483-3p (miRNAs w/seed<br>CACUCCU)           |        | 0.157  | 0.0218 |

|                                  |        |        |        |
|----------------------------------|--------|--------|--------|
| DCN                              | -0.045 | -0.954 | 0.0218 |
| vitamin D                        |        | 1.671  | 0.0218 |
| TXNIP                            | -0.476 | 0.18   | 0.0218 |
| IGFBP2                           | -0.372 | -0.186 | 0.0218 |
| GATA4                            | -0.443 | -1.221 | 0.0218 |
| UBE2I                            | 0.301  | 1.109  | 0.0224 |
| metyrapone                       |        | 0.492  | 0.0224 |
| ESRRB                            | 0.26   | 0.128  | 0.0224 |
| PPAR $\alpha$ -RXR $\alpha$      |        | -0.447 | 0.0224 |
| NDRG1                            | -0.599 | -0.528 | 0.0224 |
| leupeptin                        |        | -0.555 | 0.0224 |
| SMYD3                            |        | -1.411 | 0.0224 |
| phenytoin                        |        | -1.539 | 0.0224 |
| EHHADH                           | 0.01   | -2.219 | 0.0224 |
| NFAT (complex)                   |        |        | 0.0224 |
| SP2                              | -0.025 |        | 0.0224 |
| CHD4                             | 0.507  |        | 0.0224 |
| MKL1                             | 0.176  | 2.155  | 0.0229 |
| LMNA                             | 0.614  |        | 0.023  |
| MAPT                             | 0.148  | 2      | 0.023  |
| SERCA                            |        |        | 0.0233 |
| Stat5 dimer                      |        |        | 0.0233 |
| BCL2L12                          |        |        | 0.0233 |
| DAB2                             | 0.633  |        | 0.0233 |
| mir-26                           |        |        | 0.0233 |
| mir-320                          |        |        | 0.0233 |
| ATP2B2                           | -0.514 |        | 0.0233 |
| ERCC1                            | -0.156 |        | 0.0233 |
| PPM1B                            | 0.756  |        | 0.0233 |
| LIMS2                            | -0.008 |        | 0.0233 |
| LMO4                             | 0.465  |        | 0.0233 |
| AFF1                             | -0.621 |        | 0.0233 |
| PTGDS                            | -0.227 |        | 0.0233 |
| S1PR3                            | -0.327 |        | 0.0233 |
| SAFB                             | 0.412  |        | 0.0233 |
| CAMK2A                           | -0.056 |        | 0.0233 |
| ERCC3                            | 0.109  |        | 0.0233 |
| 6,7-dinitroquinoxaline-2,3-dione |        |        | 0.0233 |
| fluphenazine                     |        |        | 0.0233 |
| volinanserine                    |        |        | 0.0233 |
| acetic acid                      |        |        | 0.0233 |
| 4-aminophenol                    |        |        | 0.0233 |
| retinol acetate                  |        |        | 0.0233 |

|                                 |        |        |        |
|---------------------------------|--------|--------|--------|
| 2-amino-5-phosphonovaleric acid |        |        | 0.0233 |
| HDAC4                           |        | 1.387  | 0.0234 |
| Nfat (family)                   |        | 1.175  | 0.0234 |
| cobalt chloride                 |        | 1.556  | 0.0236 |
| THRA                            | -0.35  | -0.423 | 0.0242 |
| levothyroxine                   |        | 1.046  | 0.0246 |
| HBB                             | 0.03   | -1.89  | 0.0246 |
| Gsk3                            |        | 0.026  | 0.0253 |
| A2M                             | -0.114 | 2.121  | 0.0255 |
| F7                              | -0.65  | 1.945  | 0.0255 |
| Fgf                             |        | 0.497  | 0.0255 |
| verapamil                       |        | -1.414 | 0.0255 |
| NR2F2                           | 0.602  | -1.741 | 0.0255 |
| POU2F1                          | -0.222 | -0.149 | 0.0255 |
| MKL2                            | -0.101 | 1.89   | 0.026  |
| L-glutamic acid                 |        | 1.199  | 0.0267 |
| COL18A1                         | 0.216  | -1.161 | 0.0267 |
| sulindac sulfide                |        | 0.355  | 0.0269 |
| AMPK                            |        | 0.201  | 0.0269 |
| PD 153035                       |        | 0      | 0.0272 |
| mir-132                         |        | -1.98  | 0.0272 |
| NF1                             | -0.144 | -2.236 | 0.0272 |
| Ap1                             |        | -1.679 | 0.0275 |
| F2R                             | 0.61   | 3.271  | 0.0282 |
| enalapril                       |        | 0.535  | 0.0282 |
| FLI1                            | 0.339  | 0.171  | 0.0282 |
| delta-9-tetrahydrocannabinol    |        | -0.003 | 0.0282 |
| Jnk                             |        | 1.476  | 0.0286 |
| SB203580                        |        | -0.618 | 0.0286 |
| IL15                            | 0.302  | 0.406  | 0.0289 |
| CSF3                            | -0.267 | 0.486  | 0.029  |
| PPRC1                           | 0.389  | 1.265  | 0.0293 |
| IL1R1                           | -0.296 | 0.485  | 0.0293 |
| ITGA5                           | -0.33  | -1.118 | 0.0293 |
| HIPK2                           | 0.34   | -1.282 | 0.0293 |
| Pdgf (complex)                  |        | 0.645  | 0.0294 |
| KIT                             | -0.516 |        | 0.0294 |
| ASAH1                           | -0.202 | 1.026  | 0.0296 |
| THBS1                           | 1.288  | -1.216 | 0.0296 |
| NCAM1                           | -0.451 | 2.216  | 0.0296 |
| GC-GCR dimer                    |        | 1.477  | 0.0296 |
| ammonium chloride               |        | 0.447  | 0.0296 |
| nickel                          |        | 0.391  | 0.0296 |

|                                                                 |        |        |        |
|-----------------------------------------------------------------|--------|--------|--------|
| JUN/JUNB/JUND                                                   |        | 0.132  | 0.0296 |
| vanadate                                                        |        | -0.351 | 0.0296 |
| C1QA                                                            | -0.044 |        | 0.0296 |
| DL-fructose                                                     |        | 1.131  | 0.0297 |
| RGS2                                                            | 1.67   | 1      | 0.0297 |
| RASGRF1                                                         | -0.352 | 0.132  | 0.0297 |
| LXR ligand-LXR-Retinoic acid-RXR $\alpha$                       |        | -0.916 | 0.0297 |
| quetiapine                                                      |        | -1.114 | 0.0297 |
| miR-96-5p (and other miRNAs<br>w/seed UUGGCAC)                  |        | -1.982 | 0.0297 |
| Agtr1b                                                          |        |        | 0.0297 |
| mir-22                                                          |        |        | 0.0297 |
| RELN                                                            | -0.293 |        | 0.0297 |
| ING1                                                            | 0.578  |        | 0.0297 |
| quercetin                                                       |        | -0.289 | 0.0301 |
| Alpha catenin                                                   |        | -0.213 | 0.0302 |
| SRC (family)                                                    |        | 0.055  | 0.0303 |
| seocalcitol                                                     |        | 1.792  | 0.0304 |
| silibinin                                                       |        | 1.136  | 0.0304 |
| FOXP3                                                           | -0.184 | -1     | 0.0304 |
| Salmonella enterica serotype<br>abortus equi lipopolysaccharide |        | 1.003  | 0.0323 |
| SUZ12                                                           | 0.771  | -0.625 | 0.0327 |
| ZNF217                                                          |        | -0.333 | 0.0335 |
| PTK2                                                            | 0.893  | 0.189  | 0.0337 |
| MED13                                                           |        | 1.633  | 0.0339 |
| PRKG1                                                           | 0.156  | 1.387  | 0.0339 |
| cis-urocanic acid                                               |        | 0.44   | 0.0339 |
| AREG                                                            | 0.06   | 0      | 0.0339 |
| nicotinic acid                                                  |        | -0.392 | 0.0339 |
| NFIC                                                            | 0.624  | -1.091 | 0.0339 |
| TLR4                                                            | -0.08  | 0.232  | 0.0341 |
| TAZ                                                             | -0.02  |        | 0.0343 |
| cerivastatin                                                    |        | 0.746  | 0.0344 |
| MAPK9                                                           | -0.358 | 2.202  | 0.0349 |
| KLF15                                                           | 0.261  | 0.138  | 0.035  |
| N-cor                                                           |        | -0.82  | 0.035  |
| H-7                                                             |        | -1.349 | 0.035  |
| PRKCD                                                           | -0.124 | -0.446 | 0.0351 |
| CLDN7                                                           | 0.8    | 0.559  | 0.0355 |
| TFEB                                                            | -0.353 | 0.857  | 0.0356 |
| miR-27a-3p (and other miRNAs<br>w/seed UCACAGU)                 |        | 0.373  | 0.0356 |
| ETV4                                                            | -0.465 | 0.147  | 0.0356 |



|                                       |        |        |        |
|---------------------------------------|--------|--------|--------|
| dopamine                              |        | 0.399  | 0.0357 |
| sulforafan                            |        | -0.183 | 0.0357 |
| PTGS1                                 | 0.464  | 0      | 0.0358 |
| MAP2K4                                | -0.098 | 0.843  | 0.0365 |
| SNCA                                  | -0.258 | 0.842  | 0.0365 |
| carbon monoxide                       |        | -0.213 | 0.0365 |
| chloride                              |        |        | 0.0367 |
| GDP                                   |        |        | 0.0367 |
| Dynamin                               |        |        | 0.0367 |
| palbociclib                           |        |        | 0.0367 |
| Dexamethasone-GR                      |        |        | 0.0367 |
| PRCP                                  | 0.097  |        | 0.0367 |
| DROSHA                                |        |        | 0.0367 |
| C1QL1                                 | -0.383 |        | 0.0367 |
| ERFE                                  |        |        | 0.0367 |
| CHTOP                                 | 0.585  |        | 0.0367 |
| Aldosterone-MR dimer                  |        |        | 0.0367 |
| DTNBP1                                | 0.035  |        | 0.0367 |
| sepantronium                          |        |        | 0.0367 |
| DNAJC3                                | 0.738  |        | 0.0367 |
| ABL2                                  |        |        | 0.0367 |
| MYH9                                  | 0.895  |        | 0.0367 |
| Serpina3k (includes others)           | -6.085 |        | 0.0367 |
| CLDN1                                 | -0.765 |        | 0.0367 |
| TMOD1                                 | 0.127  |        | 0.0367 |
| mir-204                               |        |        | 0.0367 |
| miR-153-3p (miRNAs w/seed<br>UGCAUAG) |        |        | 0.0367 |
| SNIP1                                 | 0.056  |        | 0.0367 |
| MAPKAP1                               | -0.247 |        | 0.0367 |
| PPP1R13L                              |        |        | 0.0367 |
| EIF2B1                                | -0.255 |        | 0.0367 |
| NCOA4                                 | 0.512  |        | 0.0367 |
| PTP4A2                                | 1.283  |        | 0.0367 |
| F2RL3                                 | -0.136 |        | 0.0367 |
| TRAF7                                 | -0.21  |        | 0.0367 |
| ADCY6                                 | 0.806  |        | 0.0367 |
| UBE2L3                                | 0.304  |        | 0.0367 |
| GRB10                                 | -0.429 |        | 0.0367 |
| PPP1CA                                | 0.137  |        | 0.0367 |
| PPP5C                                 | 0.066  |        | 0.0367 |
| CTH                                   | 0.184  |        | 0.0367 |
| LOR                                   | -0.513 |        | 0.0367 |

|                                                      |        |        |
|------------------------------------------------------|--------|--------|
| MXD3                                                 | -0.183 | 0.0367 |
| RING1                                                | -0.454 | 0.0367 |
| EMD                                                  | -0.134 | 0.0367 |
| NTRK3                                                | -0.265 | 0.0367 |
| singlet oxygen                                       |        | 0.0367 |
| griseofulvin                                         |        | 0.0367 |
| gabapentin                                           |        | 0.0367 |
| dichlorodiphenyl dichloroethylene                    |        | 0.0367 |
| mecamylamine                                         |        | 0.0367 |
| amantadine                                           |        | 0.0367 |
| mianserin                                            |        | 0.0367 |
| atipamezole                                          |        | 0.0367 |
| p-chloroamphetamine                                  |        | 0.0367 |
| naphthalene                                          |        | 0.0367 |
| N-ethylmaleimide                                     |        | 0.0367 |
| nevirapine                                           |        | 0.0367 |
| trimetazidine                                        |        | 0.0367 |
| cycloserine                                          |        | 0.0367 |
| etodolac                                             |        | 0.0367 |
| actinomycin                                          |        | 0.0367 |
| 5R,11R-diethyl-5,6,11,12-tetrahydrochrysene-2,8-diol |        | 0.0367 |
| R-etodolac                                           |        | 0.0367 |
| yohimbine                                            |        | 0.0367 |
| palmitoleic acid                                     |        | 0.0367 |
| stavudine                                            |        | 0.0367 |
| 2-amino-3-phosphonopropionic acid                    |        | 0.0367 |
| N-butyldeoxynojirimycin                              |        | 0.0367 |
| GSTP1                                                | -0.444 | 0.0369 |
| L-lysine                                             |        | 0.0373 |
| glucosylceramide                                     |        | 0.0373 |
| PARP                                                 |        | 0.0373 |
| SNED1                                                |        | 0.0373 |
| RICTOR                                               | -0.358 | 0.0373 |
| CTR9                                                 | 0.366  | 0.0373 |
| ACACA                                                | -0.151 | 0.0373 |
| SNTA1                                                | 0.278  | 0.0373 |
| MED14                                                | 0.122  | 0.0373 |
| TTN                                                  | -0.682 | 0.0373 |
| ERCC4                                                | -0.638 | 0.0373 |
| MIR101                                               |        | 0.0373 |
| mir-193                                              |        | 0.0373 |
| miR-185-5p (and other miRNAs)                        |        | 0.0373 |

w/seed GGAGAGA)

|                                                         |        |        |        |
|---------------------------------------------------------|--------|--------|--------|
| NUP107                                                  | -0.159 |        | 0.0373 |
| WFS1                                                    | 0.042  |        | 0.0373 |
| RBP4                                                    | -2.452 |        | 0.0373 |
| MCAM                                                    | 0      |        | 0.0373 |
| RAD21                                                   | 0.671  |        | 0.0373 |
| diltiazem                                               |        |        | 0.0373 |
| raclopride                                              |        |        | 0.0373 |
| hydroquinone                                            |        |        | 0.0373 |
| ferric chloride                                         |        |        | 0.0373 |
| N-methyl-3,4-<br>methylenedioxyamphetamine              |        |        | 0.0373 |
| phytanic acid                                           |        |        | 0.0373 |
| betaine                                                 |        |        | 0.0373 |
| 20alpha-hydroxycholesterol                              |        |        | 0.0373 |
| Ras homolog                                             |        | 1.109  | 0.038  |
| ethoxyquin                                              |        | 0.277  | 0.038  |
| N(6)-(3-iodobenzyl)-5'-N-<br>methylcarboxamidoadenosine |        | 0.271  | 0.038  |
| IL11RA                                                  | 0.114  | 0      | 0.038  |
| naringenin                                              |        | -0.152 | 0.038  |
| MAPKAPK2                                                | 0.053  | 0.751  | 0.0386 |
| methamphetamine                                         |        | 0.017  | 0.0386 |
| RUNX2                                                   | -0.376 | -0.349 | 0.0389 |
| TNFRSF1A                                                | -0.145 | 0.276  | 0.0389 |
| Akt                                                     |        | 0.506  | 0.039  |
| FGFR1                                                   | 0.603  | -0.508 | 0.0401 |
| AVP                                                     | -0.388 | 0.598  | 0.0404 |
| KT5720                                                  |        | -0.152 | 0.0406 |
| miR-205-5p (and other miRNAs<br>w/seed CCUUCAU)         |        | -0.339 | 0.0406 |
| 27-hydroxycholesterol                                   |        | -0.655 | 0.0406 |
| LCAT                                                    | -0.898 | -1     | 0.0406 |
| topiramate                                              |        | -1     | 0.0406 |
| NPPC                                                    | -0.267 | -2     | 0.0406 |
| CDK1                                                    | -0.744 |        | 0.0406 |
| OGT                                                     | 0.945  |        | 0.0406 |
| GNRH1                                                   |        | 1.279  | 0.0413 |
| ATM                                                     | 0.422  | 1.274  | 0.0413 |
| PTHLH                                                   | -0.077 | 0.798  | 0.0413 |
| fibrin acid derivative                                  |        | 0.334  | 0.0416 |
| F3                                                      | -0.115 | 0.277  | 0.0416 |
| exenatide                                               |        | 0      | 0.0416 |
| ZEB2                                                    | 0.826  | -0.003 | 0.0416 |

|                                 |        |        |        |
|---------------------------------|--------|--------|--------|
| BMP2                            | 0.102  | -0.391 | 0.0416 |
| ELF3                            | -0.037 | -0.739 | 0.0416 |
| CD36                            | -0.25  | -0.44  | 0.0419 |
| 3,4,5,3',4'-pentachlorobiphenyl |        | 1.724  | 0.0419 |
| haloperidol                     |        | 0.351  | 0.0419 |
| SMAD7                           | 0.206  | -0.128 | 0.0419 |
| STK11                           | -0.206 | -0.813 | 0.0419 |
| phorbol esters                  |        | 1.273  | 0.0423 |
| dichlorovinylcysteine           |        | -1.335 | 0.0424 |
| ELAVL1                          | 0.205  | 1.091  | 0.0446 |
| lithium                         |        | -0.91  | 0.0446 |
| vorinostat                      |        | 0.425  | 0.0447 |
| INHA                            | -0.734 | 1.338  | 0.0461 |
| Notch                           |        | 0.433  | 0.0464 |
| SSTR2                           | -0.453 | -0.152 | 0.0478 |
| lisinopril                      |        | -1.342 | 0.0478 |
| TF                              | -1.984 | -1.551 | 0.0478 |
| IDH1                            | 0.088  |        | 0.0478 |
| PPP1R15A                        | 0.237  |        | 0.0478 |
| ADRB1                           | 0.215  |        | 0.0478 |
| HDAC2                           | 0.639  | 0.378  | 0.0482 |
| JAG2                            | -0.52  | 1.414  | 0.0486 |
| bromocriptine                   |        | 0.287  | 0.0486 |
| CXCR4                           | 0.005  | -1.31  | 0.0486 |
| Immunoglobulin                  |        | -0.453 | 0.0492 |
| PAX6                            | -0.284 | -0.597 | 0.0494 |
| E. coli B4 lipopolysaccharide   |        | 1.402  | 0.0496 |
| Pro-inflammatory Cytokine       |        | -0.277 | 0.0497 |
| HDAC3                           | 0.156  | -0.9   | 0.0497 |
| BIRC5                           | -0.078 |        | 0.0497 |

**Table S2.** cDNA array gene expression analysis of kidneys. mRNA was extracted from kidneys 48 hour after induction of BP1 and analyzed relative to controls without induction. Gene Set Enrichment Analysis (GSEA <sup>7</sup>; Broad Institute, <http://software.broadinstitute.org/gsea/index.jsp>) was applied to the data set. Hallmark pathways are shown. The size of the respective data set is shown. NES and ES = (normalized) enrichment scores; Nominal p-values and false discovery corrected p-values, q-values, are included.

| NAME                               | SIZE | ES         | NES       | NOM p-val  | FDR q-val  | FWER p-val | RANK AT MA LEADING EDGE             |
|------------------------------------|------|------------|-----------|------------|------------|------------|-------------------------------------|
| HALLMARK_COAGULATION               | 125  | 0.58361745 | 2.0375695 | 0          | 0          | 0          | 1110 tags=23%, list=8%, signal=25%  |
| HALLMARK_MYC_TARGETS_V1            | 160  | 0.5052857  | 2.260066  | 0          | 0          | 0          | 3265 tags=43%, list=24%, signal=55% |
| HALLMARK_KRAS_SIGNALING_DN         | 165  | 0.53707117 | 1.8984914 | 0          | 2.88E-04   | 0.001      | 3724 tags=52%, list=27%, signal=70% |
| HALLMARK_HYPOXIA                   | 178  | 0.3918239  | 1.8286988 | 0          | 0.00135135 | 0.001      | 2337 tags=30%, list=17%, signal=35% |
| HALLMARK_PANCREAS_BETA_CELLS       | 35   | 0.60931903 | 1.7752738 | 0.00405405 | 0.00143508 | 0.011      | 3258 tags=51%, list=24%, signal=67% |
| HALLMARK_XENOBIOTIC_METABOLISM     | 184  | 0.5025341  | 1.8154243 | 0          | 0.00157202 | 0.009      | 449 tags=14%, list=3%, signal=14%   |
| HALLMARK_MTORC1_SIGNALING          | 169  | 0.4029112  | 1.8576065 | 0          | 0.00168919 | 0.001      | 3319 tags=38%, list=24%, signal=50% |
| HALLMARK_CHOLESTEROL_HOMEOSTASIS   | 70   | 0.4716467  | 1.8866167 | 0          | 0.00225225 | 0.001      | 1641 tags=27%, list=12%, signal=31% |
| HALLMARK_UNFOLDED_PROTEIN_RESPONSE | 92   | 0.42484844 | 1.7931446 | 0          | 0.003003   | 0.003      | 2390 tags=27%, list=17%, signal=33% |
| HALLMARK_OXIDATIVE_PHOSPHORYLATION | 176  | 0.42629647 | 1.9596773 | 0          | 0.00337838 | 0.001      | 3838 tags=36%, list=28%, signal=50% |
| HALLMARK_PROTEIN_SECRETION         | 79   | 0.42448673 | 1.7675484 | 0          | 0.00371085 | 0.006      | 2677 tags=34%, list=19%, signal=42% |
| HALLMARK_INFLAMMATORY_RESPONSE     | 174  | 0.4606851  | 1.6529925 | 0          | 0.00731885 | 0.065      | 3498 tags=41%, list=25%, signal=55% |
| HALLMARK_ALLOGRAFT_REJECTION       | 172  | 0.44336256 | 1.6014868 | 0          | 0.01208986 | 0.126      | 2802 tags=31%, list=20%, signal=39% |
| HALLMARK_P53_PATHWAY               | 167  | 0.33986056 | 1.5498704 | 0          | 0.01896072 | 0.037      | 1967 tags=22%, list=14%, signal=25% |
| HALLMARK_TNFA_SIGNALING_VIA_NFKB   | 175  | 0.34041455 | 1.531902  | 0          | 0.01950792 | 0.044      | 1132 tags=18%, list=8%, signal=19%  |
| HALLMARK_TGF_BETA_SIGNALING        | 43   | 0.42256013 | 1.5143765 | 0.01333333 | 0.02262265 | 0.052      | 2684 tags=37%, list=19%, signal=46% |
| HALLMARK_UV_RESPONSE_UP            | 140  | 0.33770084 | 1.4950206 | 0          | 0.02515644 | 0.061      | 2371 tags=26%, list=17%, signal=32% |
| HALLMARK_ESTROGEN_RESPONSE_EARLY   | 156  | 0.31769428 | 1.4318058 | 0          | 0.04228199 | 0.114      | 2431 tags=29%, list=18%, signal=35% |
| HALLMARK_APICAL_SURFACE            | 36   | 0.5065839  | 1.4724264 | 0.04244032 | 0.04418378 | 0.444      | 1940 tags=33%, list=14%, signal=39% |
| HALLMARK_MITOTIC_SPINDLE           | 149  | 0.31450102 | 1.3986725 | 0.01834862 | 0.04970767 | 0.141      | 2174 tags=26%, list=16%, signal=30% |

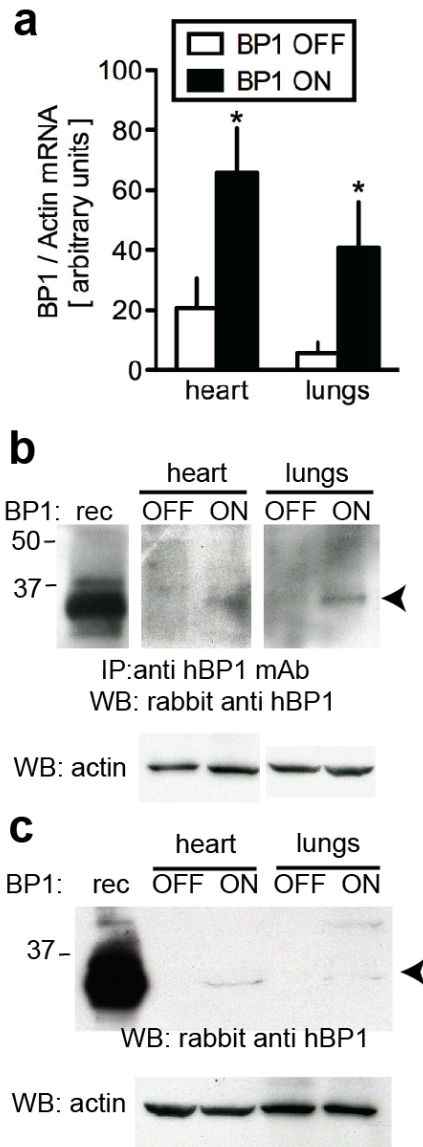

**Figure S1.** Conditional BP1 transgene expression *in vivo*. **a**, BP1 mRNA expression in hearts and lungs of BP1 OFF and ON animals. mRNA expression was monitored by quantitative RT-PCR. Expression was normalized to endogenous beta-actin mRNA (means  $\pm$  SEM;  $n = 4$  to 6 animals per group). \*,  $P < 0.05$ , BP1 ON versus OFF. **b,c**, BP1 protein expression in tissue lysates from BP1 OFF and ON animals. Immunoprecipitations (IP) followed by Western Blots (**b**) or direct Western blots of lysates (**c**). 10 mg (**b**) or 0.3 mg (**c**) of lysates were used. To compare loading between BP1 OFF and ON samples, blots for beta-actin were run in parallel. Recombinant human BP1 (20 ng; rec) was used as a positive control and arrowheads indicate the position of BP1 at an apparent molecular mass of 34 kDa. Data are representative of samples from three BP1 OFF and BP1 ON sets of organs run on parallel gels.

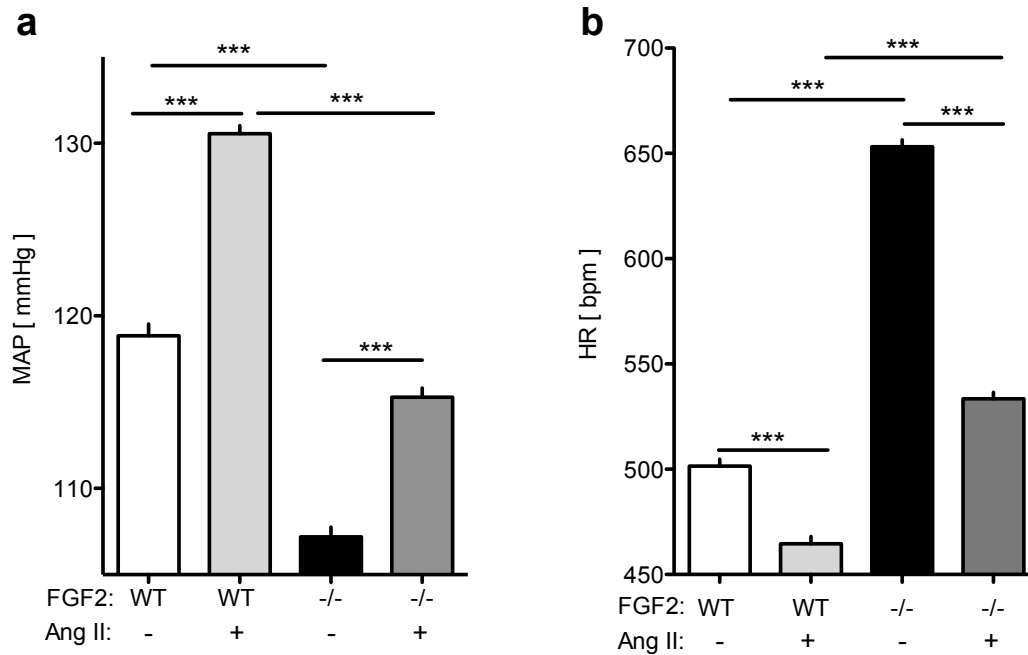

**Figure S2.** Blood pressure (MAP) and heart rate (HR) after Ang II in FGF2<sup>-/-</sup> mice. Cardiovascular parameters were obtained by telemetry in wild-type (WT; n=6) and FGF2<sup>-/-</sup> (n=7) mice. Mean MAP and HR from the peak activity time of the animals are shown. In the FGF2<sup>-/-</sup> mice baseline MAP is reduced by 15 mm Hg. Ang II treatment (400 mg/kg/day) increased MAP by 11 mm Hg in the WT animals. In the FGF2<sup>-/-</sup> animals Ang II raised the lowered MAP to the control levels. \*\*\*, *P*<0.001, ANOVA. There was no significant difference between the FGF2 WT and the FGF<sup>-/-</sup> treated with AngII.

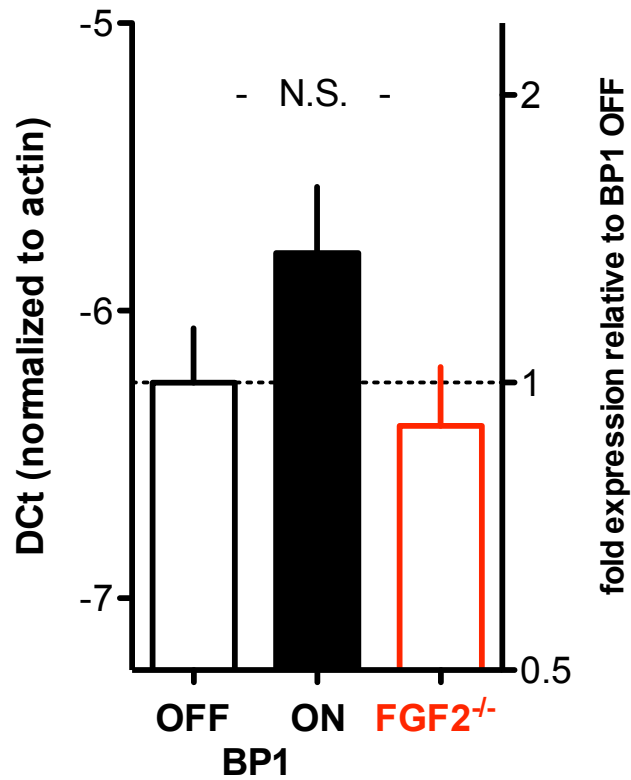

**Figure S3.** Ang II receptor type 1 (AGTR1 or AT1R) mRNA expression in kidneys from different groups of mice (n=3 per group; mean  $\pm$  SEM). qRT-PCR cycle threshold relative to actin (DCt) is shown on the left ordinate and fold expression relative to BP1 on the right ordinate. N.S., no significant difference;  $P > 0.05$ .



| Protein acronym and full name                                    | Protein ID | Peptides identified | Protein score | BP1 ON/OFF fold |
|------------------------------------------------------------------|------------|---------------------|---------------|-----------------|
| CIT=CTRO; Citron Rho-interacting kinase                          | P49025     | 21                  | 41.1          | + 3.6           |
| MKK4=MAP2K4; Dual specificity mitogen-activated protein kinase 4 | P47809     | 9                   | 41.8          | + 3.6           |
| PAK2; p21-activated kinase 2                                     | Q8CIN4     | 8                   | 42.1          | + 4.2           |
| PTPN12; Protein Tyrosine Phosphatase, Non-Receptor Type 12       | P35831     | 11                  | 41.6          | - 2.8           |

**Figure S4. Proteins identified by mass spectrometry analysis of kidney extracts from mice with BP1 ON and OFF.** Proteins in lysates from kidneys were immunoprecipitated with an anti-phospho tyrosine antibody and the precipitated complexes separated by 2D gel electrophoresis. After a Coomassie stain peaks were quantitated and cut from the gel for identification by mass spectrometry. The number of peptides identified for the respective protein, the score and the fold change based on the a comparison with the scan of control group are provided.

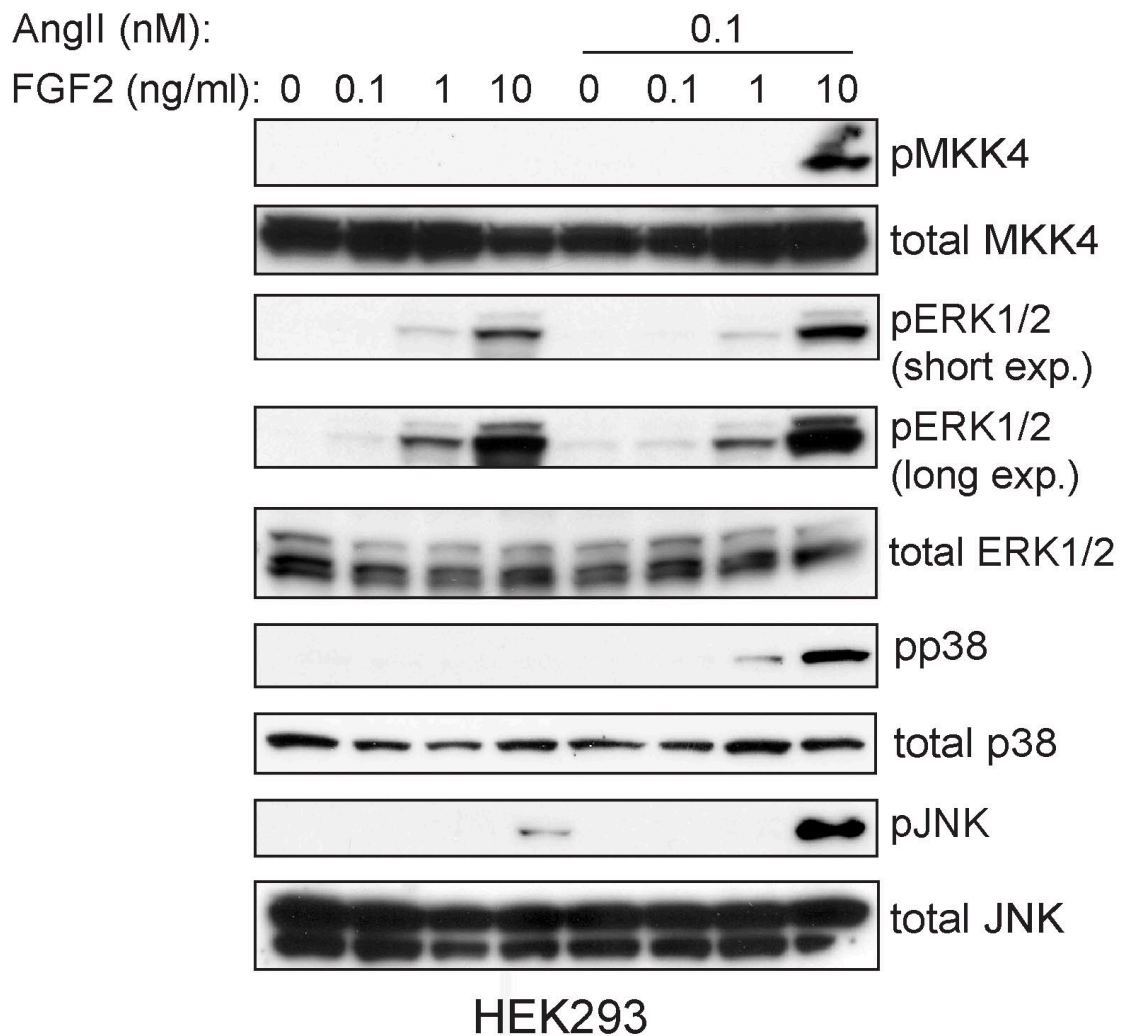

**Figure S5.** Signal transduction crosstalk between Ang II and FGF2. Serum-deprived primary HEK293 cells were treated for 10 minutes with different concentrations of FGF2  $\pm$  Ang II, as indicated. Western blot analysis for phospho- and total MKK4, ERK1/2, p38 and JNK of cell extracts is shown. Data are representative of three independent experiments. Note the synergism for pp38 induction, when both stimuli are applied.

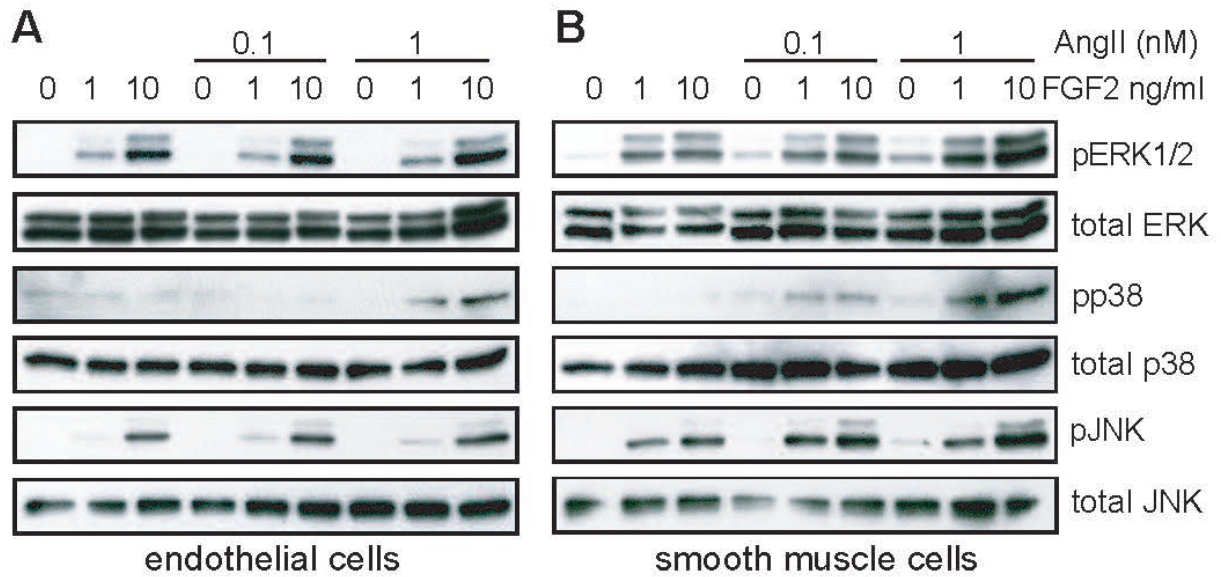

**Figure S6.** Signaling crosstalk between Ang II and FGF2. Serum-deprived primary endothelial cells (HMVEC-L) or smooth muscle cells (PASMC) were treated for 10 minutes with different concentrations of FGF2 + Ang II, as indicated. Western blot analysis for phospho- and total ERK1/2, p38 and JNK of cell extracts is shown. Data are representative of three independent experiments. Serum-deprived primary endothelial cells (HUVEC ) or smooth muscle cells were treated for 10 minutes with different concentrations of FGF2 + Ang II, as indicated. Western blot analysis for phospho- and total ERK1/2, p38 and JNK of cell extracts is shown. Note the synergism for pp38 induction, when both stimuli are applied in contrast to FGF2 alone or AngII alone.
